# Supplementary material for: Red-light photoswitching of indigos in polymer thin films
Source: PubMed Central journal article supplement — Chem Sci. 2023 Feb 22;14(10):2482–8. doi: 10.1039/d2sc06790k (PMC9993840; doi:10.1039/d2sc06790k), 2023-02-22
Supplement: SC-014-D2SC06790K-s001.pdf [file SC-014-D2SC06790K-s001.pdf]

## Supporting information

### Red-light photoswitching of indigos in polymer thin films

Kim Kuntze<sup>a</sup>, Jani Viljakka<sup>a</sup>, Matti Virkki<sup>a</sup>, Chung-Yang (Dennis) Huang<sup>b\*</sup>, Stefan Hecht<sup>c,d\*</sup> and Arri Priimagi<sup>a\*</sup>

<sup>a</sup> Smart Photonic Materials, Faculty of Engineering and Natural Sciences, Tampere University, FI-33101 Tampere, Finland. arri.priimagi@tuni.fi

<sup>b</sup> Institute for Chemical Reaction Design and Discovery (WPI-ICReDD), Hokkaido University, Kita 21, Nishi 10, Kita-ku, Sapporo, Hokkaido 001-0021, Japan.

<sup>c</sup> Department of Chemistry & IRIS Adlershof, Humboldt-Universität zu Berlin, Brook-Taylor-Strasse 2, 12489 Berlin, Germany.

<sup>d</sup> DWI – Leibniz Institute for Interactive Materials, Forckenbeckstrasse 50, 52074 Aachen, Germany.

## Abstract

Through simple synthetic derivatisation, the parent indigo dye becomes a red-light *E–Z* photoswitch exhibiting negative photochromism and tuneable thermal isomerisation kinetics. These attributes make indigo derivatives extremely attractive for applications related to materials and living systems. However, there is a lack of knowledge in translating indigo photoswitching dynamics from solution to solid state – the environment crucial for most applications. Herein, we study the photoswitching performance of six structurally distinct indigo derivatives in five polymers of varying rigidity. Three key strategies are identified to enable efficient photoswitching under red (660 nm) light: (i) choosing a soft polymer matrix to minimise its resistance toward the isomerisation, (ii) creating free volume around the indigo molecules through synthetic modifications, and (iii) applying low dye loading (<1% w/w) to inhibit aggregation. These strategies are shown to improve both photostationary state distributions and the thermal stability of the *Z* isomer. When all three strategies are implemented, the isomerisation performance (>80% *Z* form in the photostationary state) is nearly identical to that in solution. These findings thus pave the way for designing new red-light photochromic materials based on indigos.

## Table of contents

|                                       |            |
|---------------------------------------|------------|
| <b>1. Supporting results</b>          | <b>S1</b>  |
| <b>2. Experimental details</b>        | <b>S8</b>  |
| <b>Synthesis</b>                      | <b>S8</b>  |
| <b>Photochemical characterisation</b> | <b>S17</b> |
| <b>Thermal isomerisation</b>          | <b>S26</b> |
| <b>Sample preparation</b>             | <b>S37</b> |
| <b>References</b>                     | <b>S38</b> |

## 1. Supporting Results

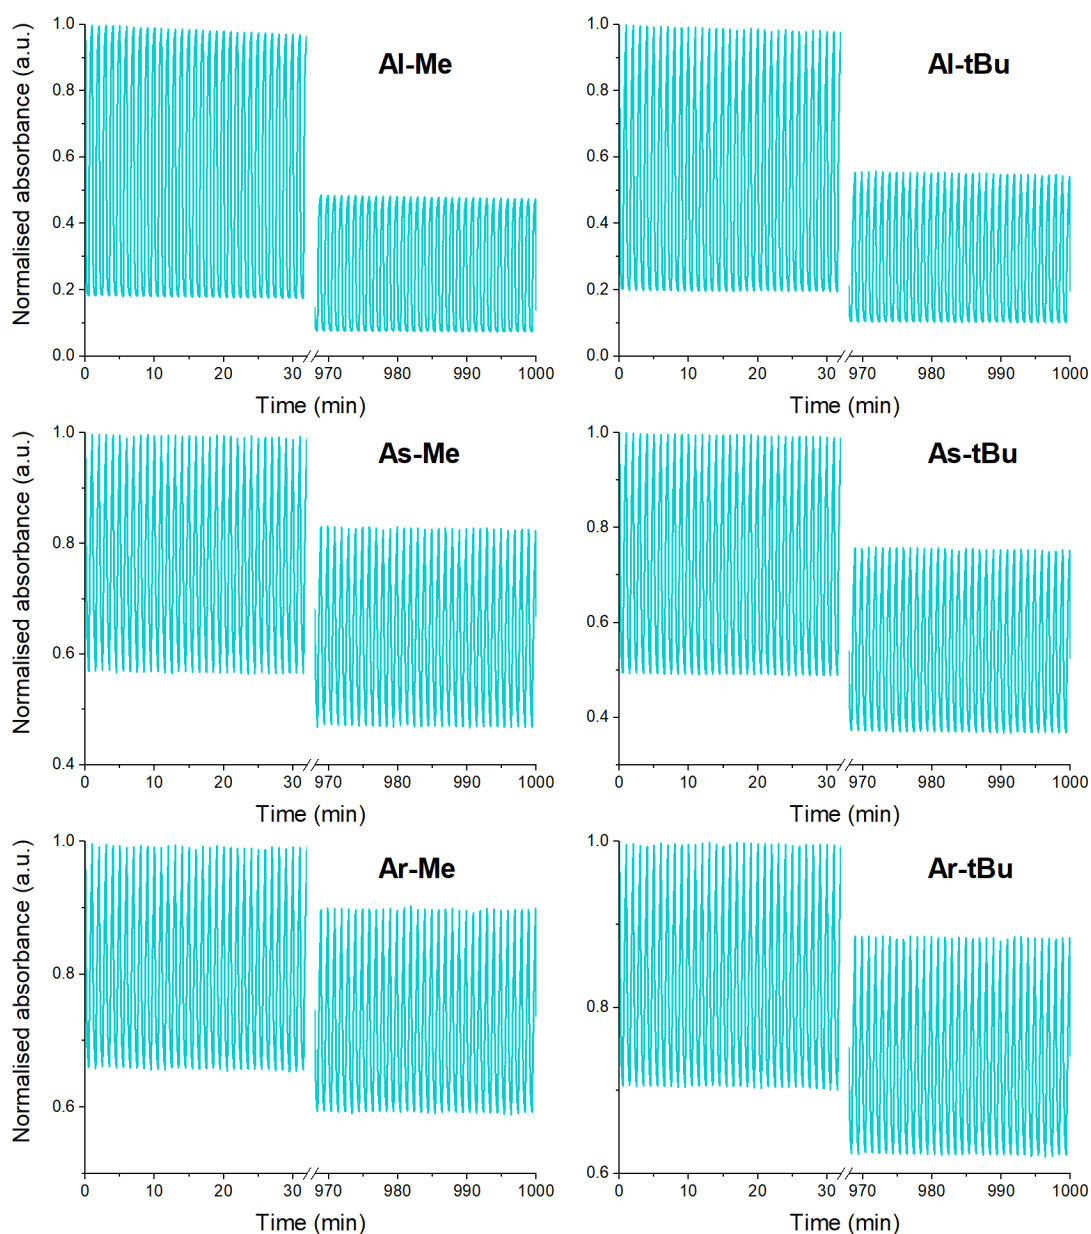

**Figure S1.** 1,000 irradiation cycles (alternating 30 s pulses of 660 and 500 nm light) of the studied compounds in solution (50  $\mu\text{M}$  in acetonitrile), showing that after 1,000 cycles 50–90 % of the initial dye concentration is conserved. The stability seems to be best for the aryl-substituted switches and worst for the alkyl-substituted switches.

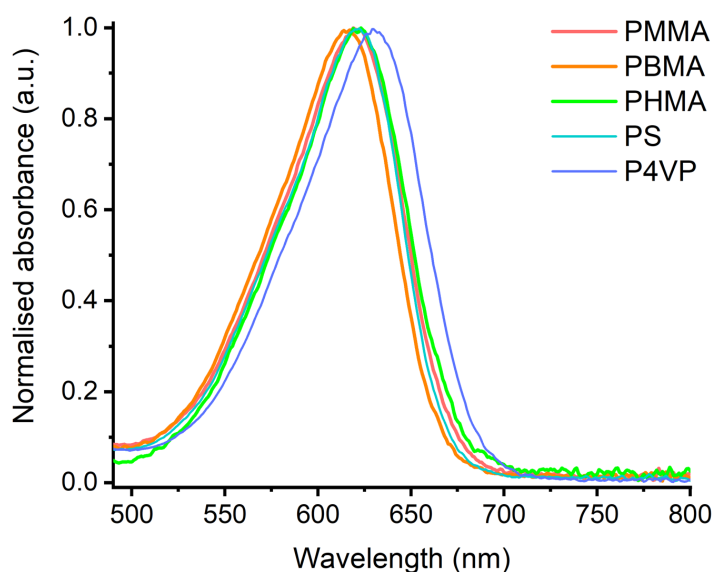

**Figure S2.** A zoom-in of the absorption spectrum of *Al-Me* in the studied polymer environments.

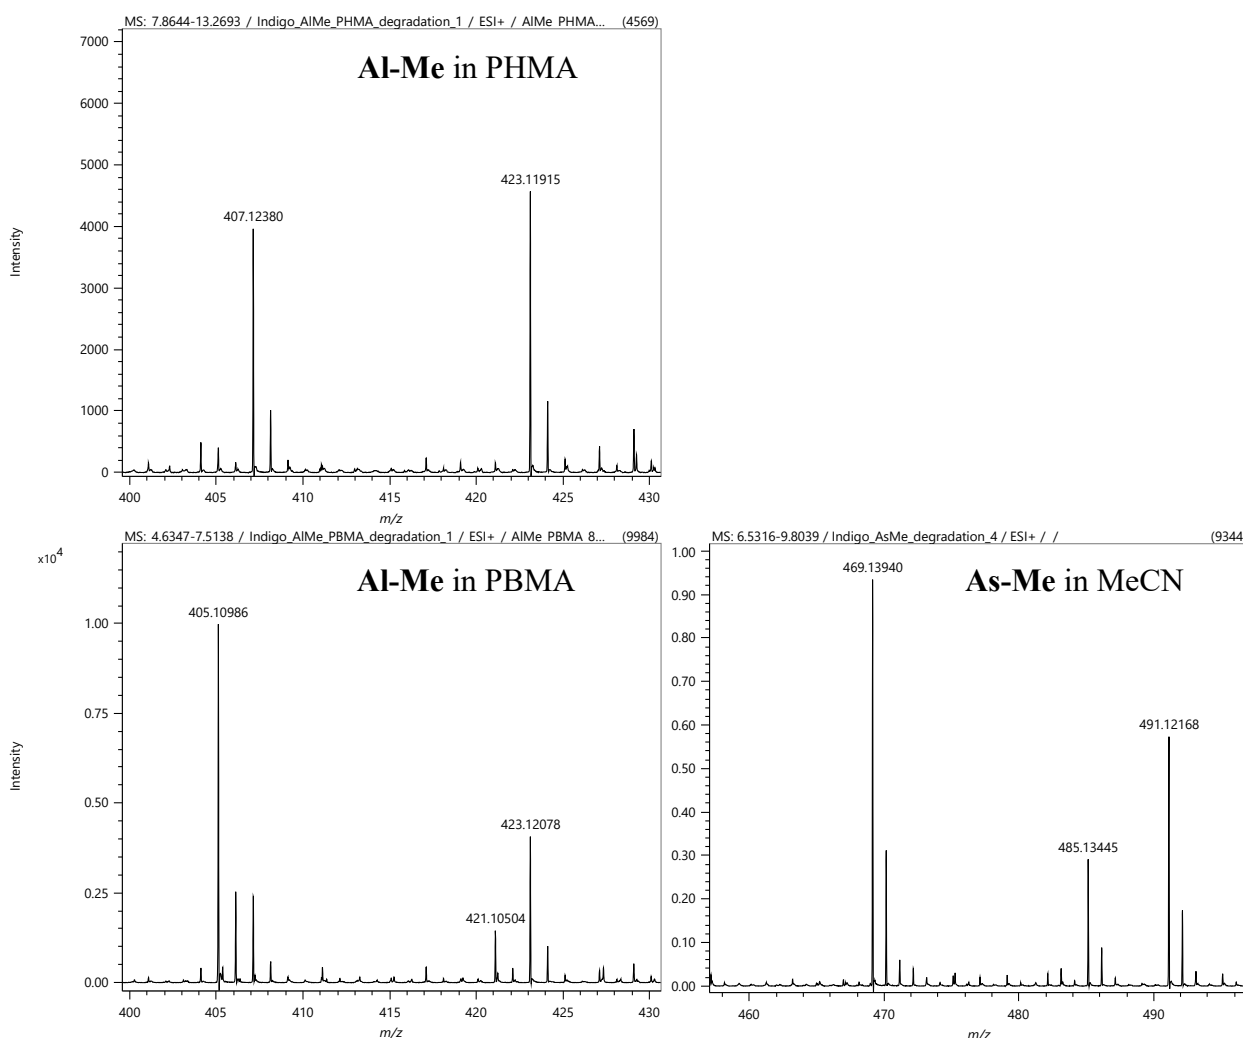

**Figure S3.** A zoom-in of the LC-MS spectra of degradation mixtures of *Al-Me* in PHMA and PBMA, and *As-Me* in MeCN. The spectra have been corrected to the  $[M+H]^+$  signal, which for *Al-Me* is 407.1238 and for *As-Me* is 469.1394. In all three cases, a signal at  $[M+16+H]^+$  is observed. In the case of *Al-Me* in PBMA, an additional signal at  $[M-2+H]^+$  is visible at 405.10986.

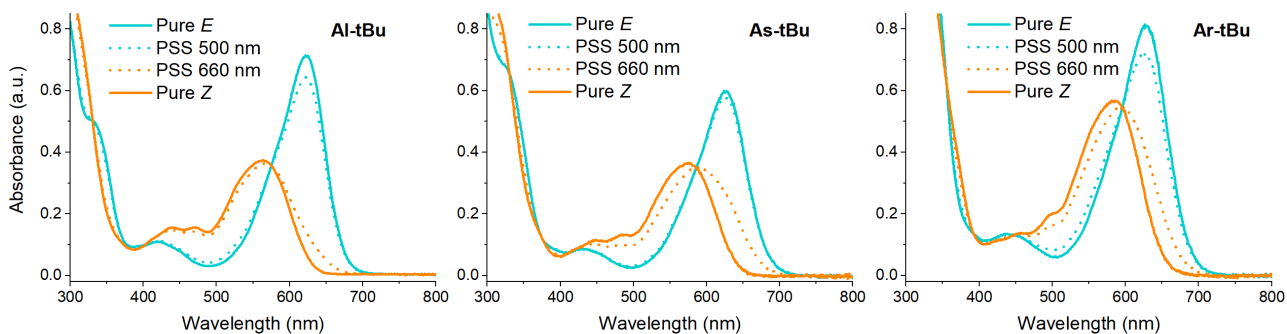

**Figure S4.** Absorption spectra of the *tert*-butyl-substituted compounds in solution ( $50 \mu\text{M}$  in acetonitrile).

**Table S1.** Photochemical properties of the *tert*-butyl-substituted compounds in solution ( $50 \mu\text{M}$  in acetonitrile).

|               | $\lambda_E$ (nm) | $\lambda_Z$ (nm) | PSS <sub>660 nm</sub> (% Z) | PSS <sub>500 nm</sub> (% E) | Dark (% E) | $t_{1/2}$ (min) |
|---------------|------------------|------------------|-----------------------------|-----------------------------|------------|-----------------|
| <b>Al-tBu</b> | 623              | 564              | 87                          | 89                          | 100        | 2.5             |
| <b>As-tBu</b> | 626              | 576              | 68                          | 95                          | 100        | 3.9             |
| <b>Ar-tBu</b> | 627              | 584              | 73                          | 84                          | 82         | 26              |

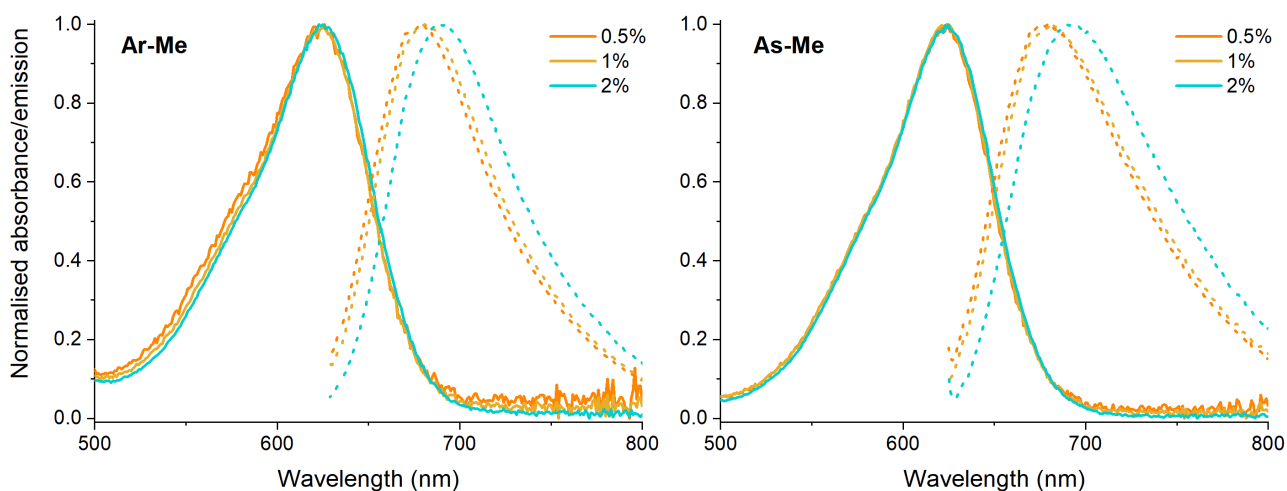

**Figure S5.** A zoom-in of the absorption and fluorescence spectra of *Ar-Me* and *As-Me* (0.5–2%) in PHMA.

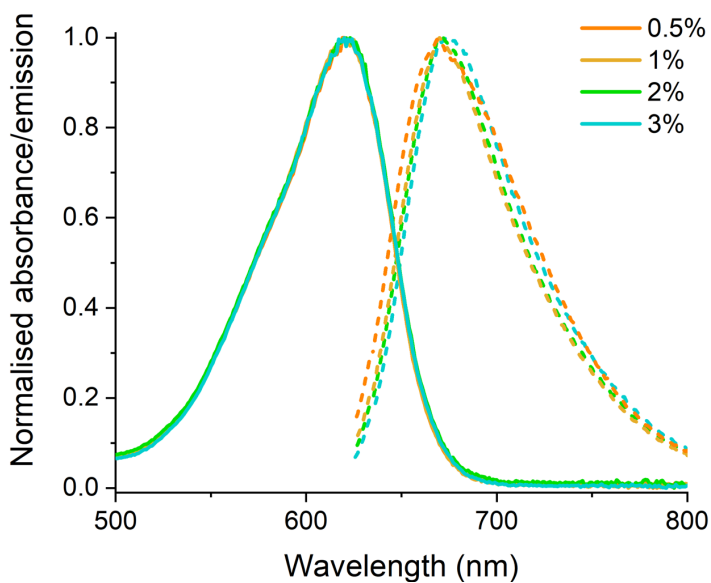

**Figure S6.** A zoom-in of the absorption and fluorescence spectra of *Al-Me* (0.5–3%) in PS.

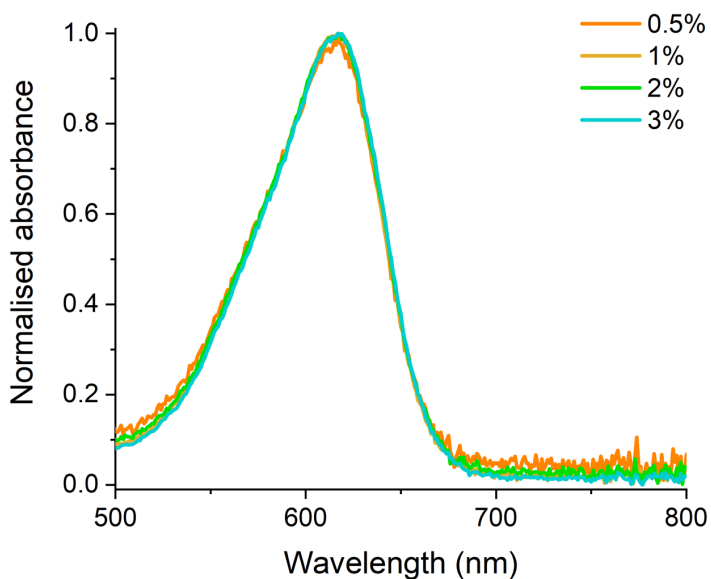

**Figure S7.** A zoom-in of the absorption spectrum of *Al-Me* (0.5–3%) in PBMA.

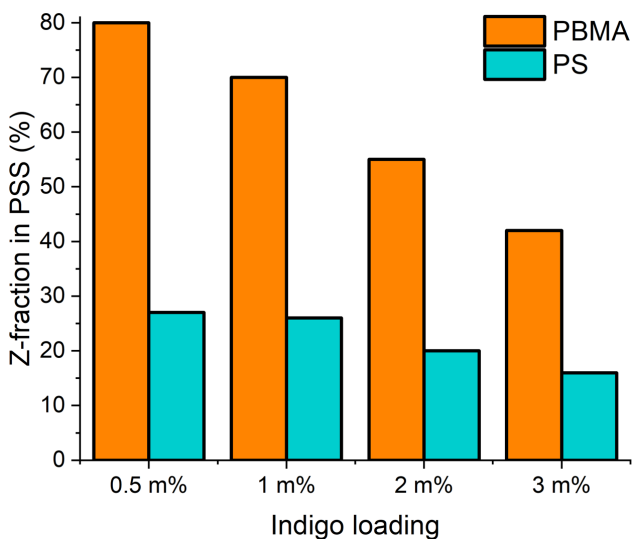

**Figure S8.** Z-fraction in PSS for *Al-Me* in PBMA and PS with different indigo loadings.

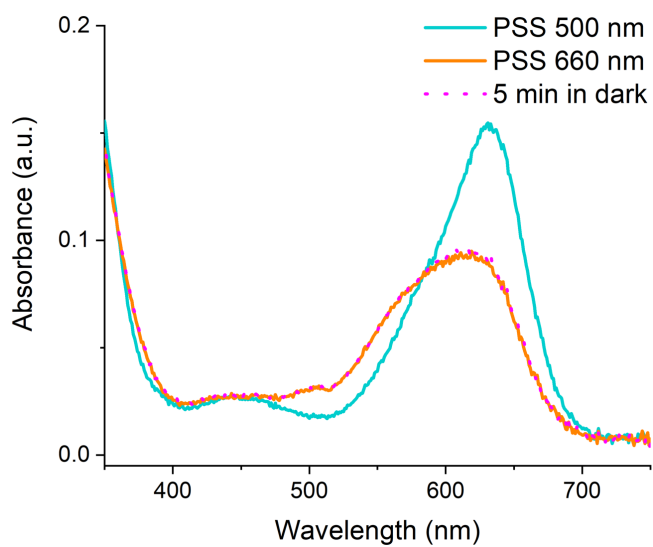

**Figure S9.** Absorption spectrum of *Ar-tBu* in PS (0.5% w/w) upon irradiation with 500 nm and 660 nm light and 5 minutes after the 660 nm irradiation was stopped.

**Table S2.** *Compiled photochemical characteristics of studied indigo–polymer samples.*

| <b>Polymer</b> | <b>Indigo</b> | <b>w/w</b> | <b>Abs <math>\lambda_{\max}</math></b> | <b>Em <math>\lambda_{\max}</math></b> | <b>PSS<sub>660 nm</sub> (% Z)</b> | <b>t<sub>1/2</sub> (min)</b> |
|----------------|---------------|------------|----------------------------------------|---------------------------------------|-----------------------------------|------------------------------|
| PHMA           | Al-Me         | 0.25%      | 615                                    | 658                                   | 68                                | 0.60                         |
| PHMA           | Al-Me         | 0.5%       | 615                                    | 659                                   | 67                                | 0.65                         |
| PHMA           | Al-Me         | 1%         | 615                                    | 660                                   | 52                                | 0.35                         |
| PHMA           | Al-Me         | 2%         | 616                                    | 668                                   | 33                                | 0.22                         |
| PHMA           | Al-Me         | 3%         | 618                                    | 669                                   | 23                                | 0.036                        |
| PHMA           | Al-Me         | 5%         | 626                                    | 675                                   | 13                                | 0.016                        |
| PHMA           | Al-Me         | 10%        | 627                                    | 682                                   | 10                                | 0.002                        |
| PHMA           | Al-tBu        | 0.5%       | 621                                    | 665                                   | 83                                | 4.55                         |
| PHMA           | Al-tBu        | 1%         | 621                                    | 663                                   | 74                                | 3.32                         |
| PHMA           | Al-tBu        | 2%         | 621                                    | 663                                   | 57                                | 1.68                         |
| PHMA           | Al-tBu        | 3%         | 621                                    | 668                                   | 41                                | 0.61                         |
| PHMA           | Al-tBu        | 5%         | 621                                    | 671                                   | 26                                | 0.32                         |
| PHMA           | Al-tBu        | 10%        | 622                                    | 671                                   | 24                                | 0.11                         |
| PHMA           | Ar-Me         | 0.5%       | 625                                    | 680                                   | 68                                | -                            |
| PHMA           | Ar-Me         | 1%         | 625                                    | 681                                   | 64                                | -                            |
| PHMA           | Ar-Me         | 2%         | 625                                    | 692                                   | 40                                | -                            |
| PHMA           | As-Me         | 0.5%       | 625                                    | 680                                   | 51                                | -                            |
| PHMA           | As-Me         | 1%         | 625                                    | 682                                   | 43                                | -                            |
| PHMA           | As-Me         | 2%         | 625                                    | 694                                   | 22                                | -                            |
| PHMA           | Ar-tBu        | 0.5%       | 623                                    | -                                     | 66                                | -                            |
| PHMA           | Ar-tBu        | 1%         | 623                                    | -                                     | 65                                | -                            |
| PHMA           | Ar-tBu        | 2%         | 623                                    | -                                     | 59                                | -                            |
| PHMA           | As-tBu        | 0.5%       | 626                                    | -                                     | 57                                | -                            |
| PHMA           | As-tBu        | 1%         | 626                                    | -                                     | 49                                | -                            |
| PHMA           | As-tBu        | 2%         | 626                                    | -                                     | 44                                | -                            |
| PBMA           | Al-Me         | 0.5%       | 617                                    | -                                     | 80                                | -                            |
| PBMA           | Al-Me         | 1%         | 617                                    | -                                     | 70                                | -                            |
| PBMA           | Al-Me         | 2%         | 617                                    | -                                     | 55                                | 0.85                         |
| PBMA           | Al-Me         | 3%         | 617                                    | -                                     | 42                                | -                            |
| PBMA           | Ar-Me         | 2%         | 626                                    | -                                     | 47                                | 101.8                        |
| PBMA           | As-Me         | 2%         | 624                                    | -                                     | 37                                | 8.39                         |
| PMMA           | Al-Me         | 2%         | 620                                    | 668                                   | 47                                | 0.67                         |
| PMMA           | Ar-Me         | 2%         | 628                                    | 686                                   | 19                                | 21.97                        |
| PMMA           | As-Me         | 2%         | 625                                    | 686                                   | 21                                | 4.33                         |
| PS             | Al-Me         | 0.5%       | 621                                    | 670                                   | 27                                | -                            |
| PS             | Al-Me         | 1%         | 621                                    | 671                                   | 26                                | -                            |
| PS             | Al-Me         | 2%         | 621                                    | 673                                   | 20                                | 0.59                         |
| PS             | Al-Me         | 3%         | 621                                    | 676                                   | 16                                | -                            |
| PS             | Ar-Me         | 2%         | 626                                    | 696                                   | 16                                | 29.37                        |
| PS             | As-Me         | 2%         | 628                                    | 701                                   | 15                                | 12.72                        |
| PS             | Ar-tBu        | 0.5%       | 628                                    | -                                     | 51                                | 584.2                        |
| PS             | Ar-tBu        | 1%         | 628                                    | -                                     | 37                                | -                            |
| PS             | Ar-tBu        | 2%         | 628                                    | -                                     | 26                                | -                            |
| P4VP           | Al-Me         | 2%         | 631                                    | -                                     | 17                                | 1.27                         |
| P4VP           | Ar-Me         | 2%         | 635                                    | -                                     | 18                                | 10.9 <sup>a</sup>            |
| P4VP           | As-Me         | 2%         | 635                                    | -                                     | 12                                | 8.89                         |

<sup>a</sup> Due to large stretched exponential fitting error margins, a biexponential fit was used instead (see p. S28–S29 and S31).

## 2. Experimental details

### Synthesis

Synthetic work was carried out in Tampere University. All reagents, polymers and solvents were commercial and purchased from Sigma Aldrich, TCI Europe, VWR, PolymerSource or FluoroChem. When needed, dry solvents were acquired using an Inert PureSolv solvent purification system. Reactions were monitored with thin-layer chromatography (TLC) on commercial Merck Silica 60 F<sub>254</sub> TLC plates, and the developed plates were visualized with UV irradiation (254 nm) or with a potassium permanganate stain.

Accurate mass experiments were performed with the JEOL JMS-T100LP AccuTOF LC-plus 4G Time-of-Flight mass spectrometer using electrospray ionization. Nuclear magnetic resonance spectra (NMR) were measured with a 500 MHz JEOL ECZR 500 (125 MHz for <sup>13</sup>C) at 25 °C and processed with the JEOL Delta NMR software version 5.3.1 (Windows). Chemical shifts are given in ppm and are referenced to solvent signals (CHCl<sub>3</sub>: δ = 7.26 ppm (<sup>1</sup>H), 77.16 ppm (<sup>13</sup>C)). Multiplicities are abbreviated as follows: singlet (s), doublet (d), triplet (t), quartet (q), pentet (p), and multiplet (m). Coupling constants (*J*) are given in Hz.

#### AI-Me: Dimethyl 4,4'-(3,3'-dioxo-[2,2'-biindolinylidene]-1,1'-diyl)(*E*)-dibenzoate

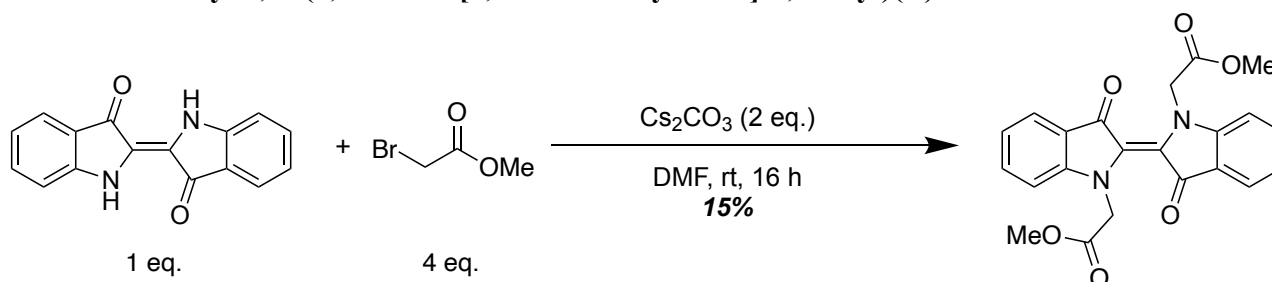

Indigo (2.0 g, 7.7 mmol), methyl bromoacetate (2.84 ml, 30.8 mmol) and caesium carbonate (5.0 g, 15.4 mmol) were stirred in *N,N*-dimethylformamide (50 ml) at room temperature overnight. The reaction mixture was then filtered through a plug of SiO<sub>2</sub>, diluted with ethyl acetate, washed with brine and three times with water, dried with magnesium sulphate, concentrated and purified by flash column chromatography (SiO<sub>2</sub>, 40% ethyl acetate in hexane) to yield AI-Me (380 mg, 15%) as a turquoise solid. <sup>1</sup>H-NMR (500 MHz, CDCl<sub>3</sub>) δ 7.72 (d, *J* = 6.9 Hz, 2H), 7.52 (t, *J* = 7.2 Hz, 2H), 7.06 (t, *J* = 7.4 Hz, 2H), 7.00 (d, *J* = 8.0 Hz, 2H), 4.81 (s, 4H), 3.75 (s, 6H). <sup>13</sup>C-NMR (126 MHz, CDCl<sub>3</sub>) δ 186.3, 169.5, 153.7, 135.8, 127.0, 124.5, 122.1, 122.0, 111.1, 52.5, 50.9. HRMS (ESI<sup>+</sup>): *m/z* calcd. for [C<sub>22</sub>H<sub>18</sub>N<sub>2</sub>O<sub>6</sub>+Na<sup>+</sup>]: 429.10571; found: 429.10521.



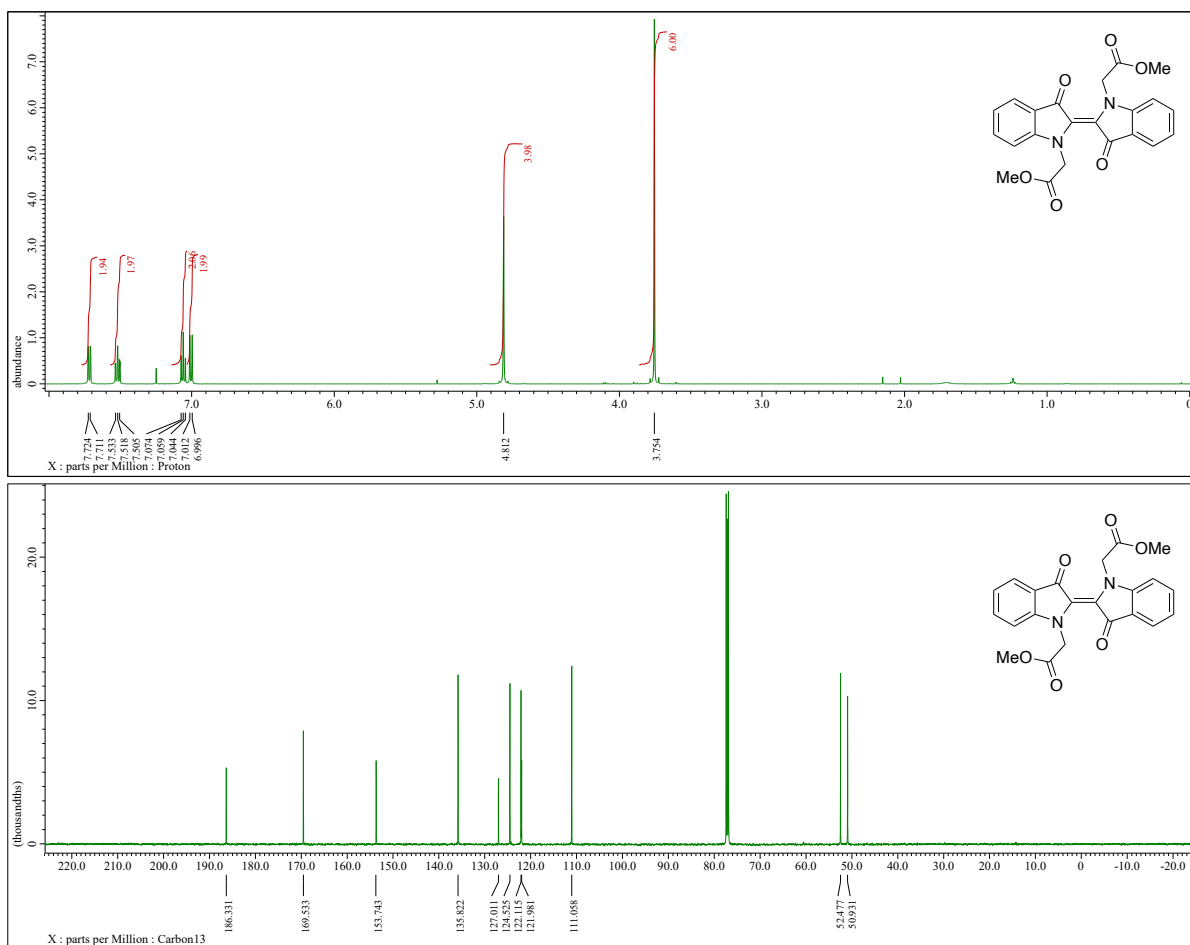

**Ar-Me: Dimethyl 4,4'-(3,3'-dioxo-[2,2'-biindolinylidene]-1,1'-diyl)(*E*)-dibenzoate**

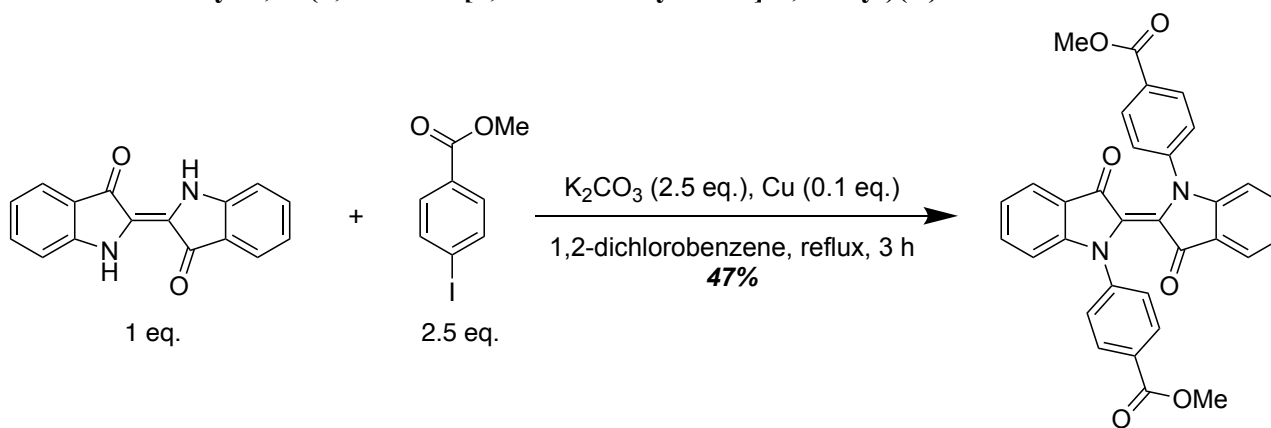

Indigo (400 mg, 1.53 mmol), methyl 4-iodobenzoate (1.05 g, 3.82 mmol) and copper powder (10 mg, 153  $\mu\text{mol}$ ) were refluxed in bubble-degassed dichlorobenzene (20 ml) under argon for 3 hours. The appearance of a deep blue monoarylated indigo was first observed, followed by its disappearance and the appearance of a turquoise diarylated trans product, isomerizing to the purple cis isomer in the mixture. The crude product was filtered through a plug of  $\text{SiO}_2$ , concentrated and purified by column ( $\text{SiO}_2$ , from pure dichloromethane to 20% ethyl acetate in dichloromethane) to yield the product (365 mg, 47%) as a turquoise solid.  $^1\text{H-NMR}$  (500 MHz,  $\text{CDCl}_3$ )  $\delta$  8.20 (d,  $J = 8.6$  Hz, 4H), 7.60 (d,  $J = 8.6$  Hz, 4H), 7.54 (d,  $J = 7.4$  Hz, 2H), 7.38 (t,  $J = 8.0$  Hz, 2H), 7.06 (d,  $J = 8.6$  Hz, 2H), 7.00 (t,  $J = 7.4$  Hz, 2H), 3.91 (s, 6H).  $^{13}\text{C-NMR}$  (126 MHz,  $\text{CDCl}_3$ )  $\delta$  184.2, 166.3, 152.5, 146.0, 135.4, 131.2, 128.5, 126.1, 125.4, 124.5, 122.7, 121.8, 111.2, 52.4. HRMS (ESI<sup>+</sup>):  $m/z$  calcd. for

[C<sub>32</sub>H<sub>22</sub>N<sub>2</sub>O<sub>6</sub>+Na<sup>+</sup>]: 553.13701; found: 553.13711. Note: the unassigned low-intensity peaks belong to the *Z* isomer that is present in a thermodynamic equilibrium.

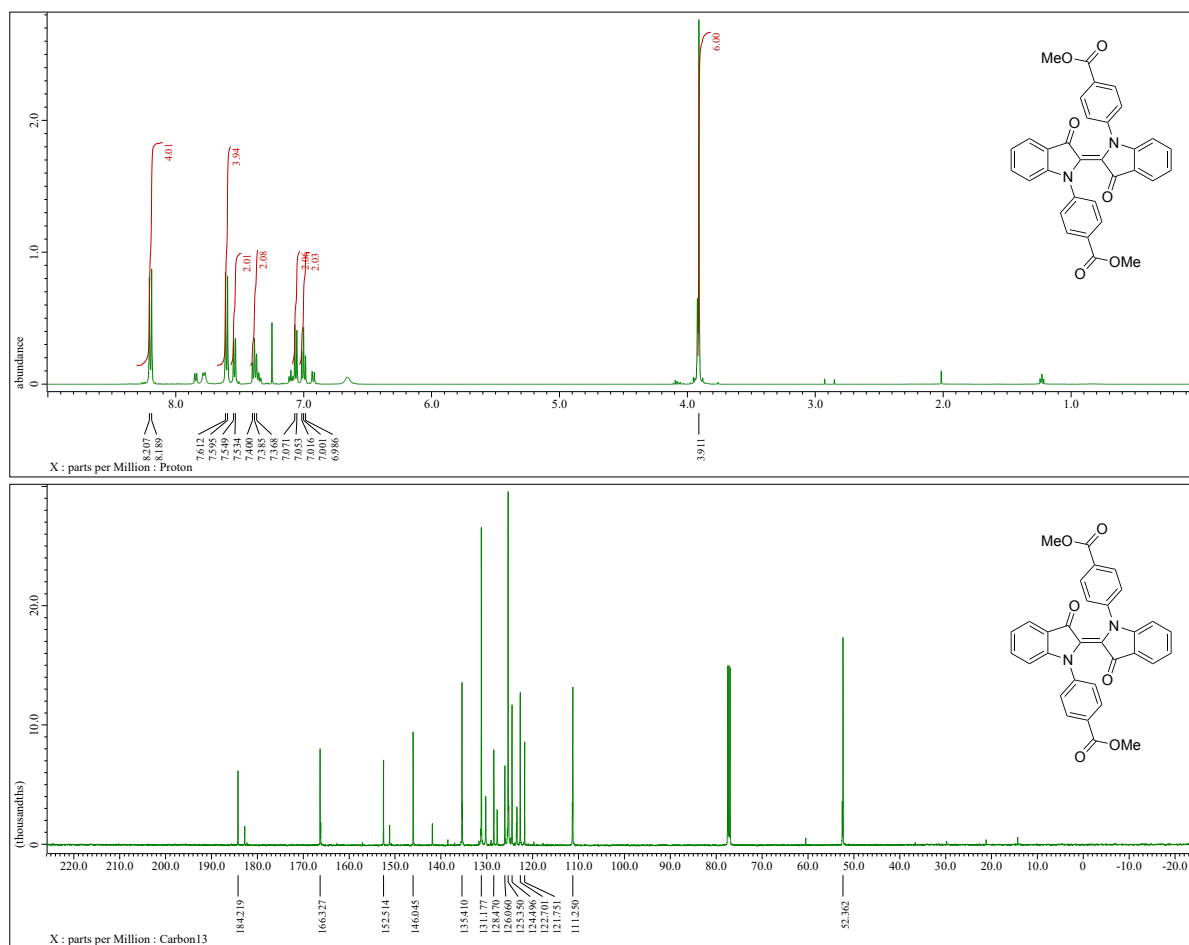

### As-Me-pre: Methyl (*E*)-4-(3,3'-dioxo-[2,2'-biindolinylidene]-1-yl)benzoate

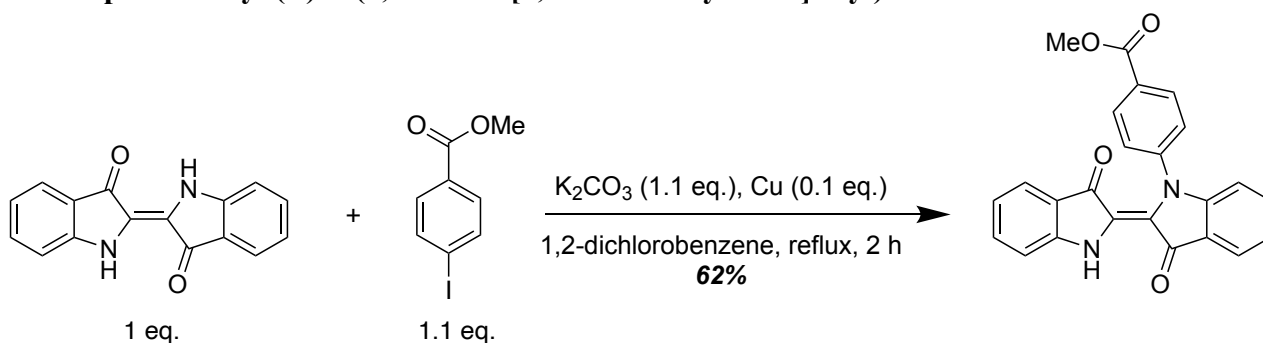

Indigo (200 mg, 0.77 mmol), methyl 4-iodobenzoate (233 mg, 0.85 mmol), potassium carbonate (117 mg, 0.85 mmol) and copper powder (5 mg, 0.077 mmol) were refluxed in bubble-degassed 1,2-dichlorobenzene (8 ml) under an argon atmosphere for 1.5 hours. The reaction mixture was filtered through a plug of SiO<sub>2</sub>, concentrated and purified by flash column chromatography (SiO<sub>2</sub>, pure dichloromethane to 10% ethyl acetate in dichloromethane) to yield **As-Me-pre** (189 mg, 62%) as a dark blue solid. <sup>1</sup>H-NMR (500 MHz, CDCl<sub>3</sub>) δ 10.47 (s, 1H), 8.17 (d, J = 8.0 Hz, 2H), 7.82 (d, J = 7.4 Hz, 1H), 7.46 (t, J = 7.2 Hz, 2H), 7.43-7.40 (m, 3H), 7.09 (t, J = 7.4 Hz, 1H), 7.00 (t, J = 8.6 Hz, 2H), 6.89 (t, J = 7.4 Hz, 1H), 3.93 (s, 3H). <sup>13</sup>C-NMR (126 MHz, CDCl<sub>3</sub>) δ 189.5, 185.8, 166.5, 153.1,

151.5, 144.8, 136.2, 135.8, 130.8, 128.7, 126.2, 126.1, 124.9, 124.1, 122.0, 121.3, 121.2, 121.1, 120.1, 112.0, 111.6, 52.3. HRMS (ESI<sup>+</sup>): *m/z* calcd. for [C<sub>24</sub>H<sub>16</sub>N<sub>2</sub>O<sub>4</sub>+Na<sup>+</sup>]: 419.10023; found: 419.09995.

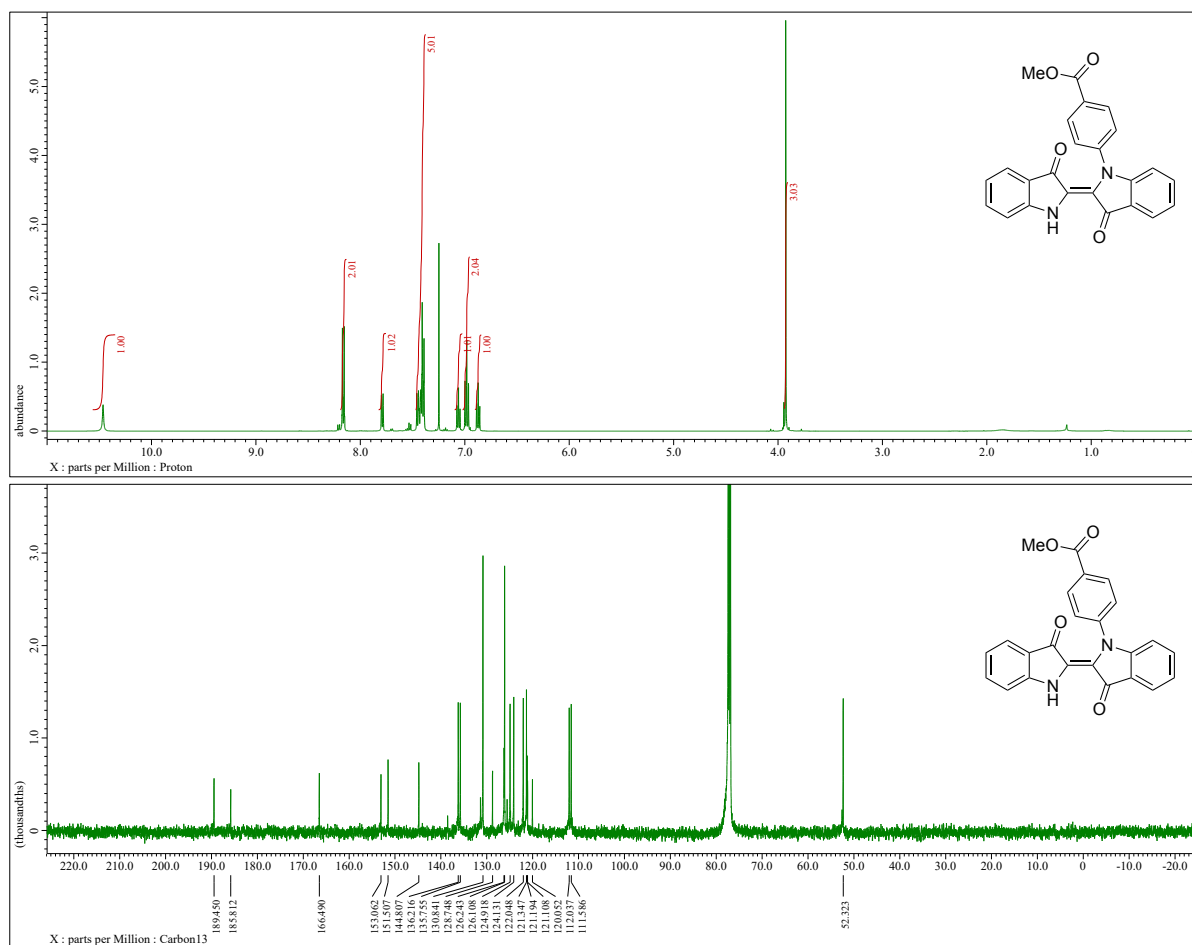

**As-Me: Methyl (*E*)-4-(1'-(2-methoxy-2-oxoethyl)-3,3'-dioxo-[2,2'-biindolylidene]-1-yl)benzoate**

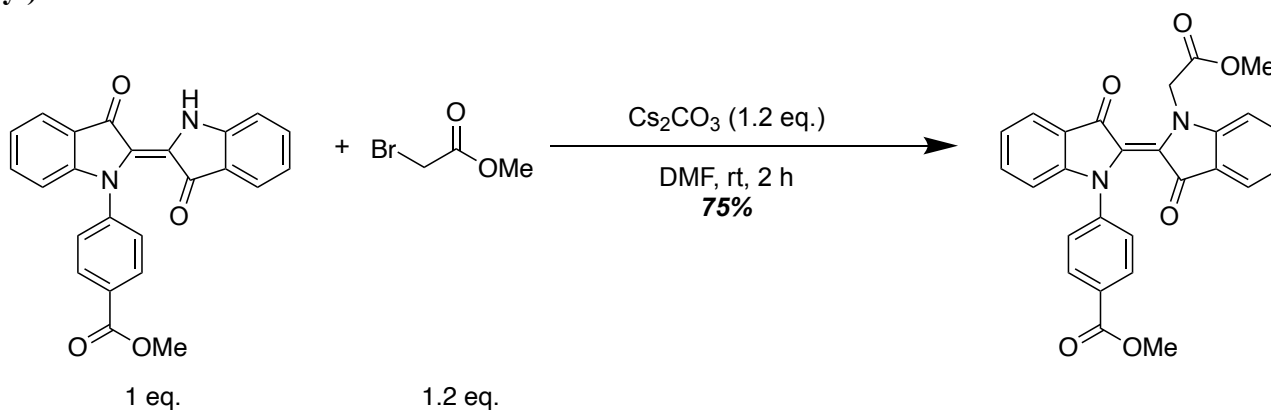

**As-Me-pre** (49.4 mg, 0.134 mmol), methyl bromoacetate (14.9  $\mu$ l, 0.161 mmol) and caesium carbonate (52.5 mg, 0.161 mmol) were stirred in *N,N*-dimethylformamide (2 ml) at room temperature for 2 hours. The reaction mixture was then diluted with ethyl acetate, washed with brine and three times with water, dried with magnesium sulphate, concentrated and purified by flash column chromatography (pure dichloromethane to 5% ethyl acetate in dichloromethane) to yield **As-Me** (44.1 mg, 75%) as a turquoise solid. <sup>1</sup>H-NMR (500 MHz, CDCl<sub>3</sub>)  $\delta$  8.14 (d, *J* = 8.6 Hz, 2H), 7.79 (d, *J* =

6.9 Hz, 1H), 7.57 (d,  $J = 8.6$  Hz, 2H), 7.42-7.52 (m, 3H), 7.18 (d,  $J = 8.6$  Hz, 1H), 7.09 (t,  $J = 7.4$  Hz, 1H), 6.99 (s, 2H), 5.20 (s, 2H), 3.89 (s, 3H), 3.77 (s, 3H).  $^{13}\text{C}$ -NMR (126 MHz,  $\text{CDCl}_3$ )  $\delta$  186.0, 184.4, 169.2, 166.5, 153.0, 152.4, 146.3, 135.7, 135.4, 131.0, 129.2, 127.9, 125.1, 124.7, 124.5, 124.1, 122.5, 122.4, 122.2, 121.9, 111.3, 110.5, 52.7, 52.3, 49.9. HRMS (ESI<sup>+</sup>):  $m/z$  calcd. for  $[\text{C}_{27}\text{H}_{20}\text{N}_2\text{O}_6+\text{Na}^+]$ : 491.12136; found: 491.11888.

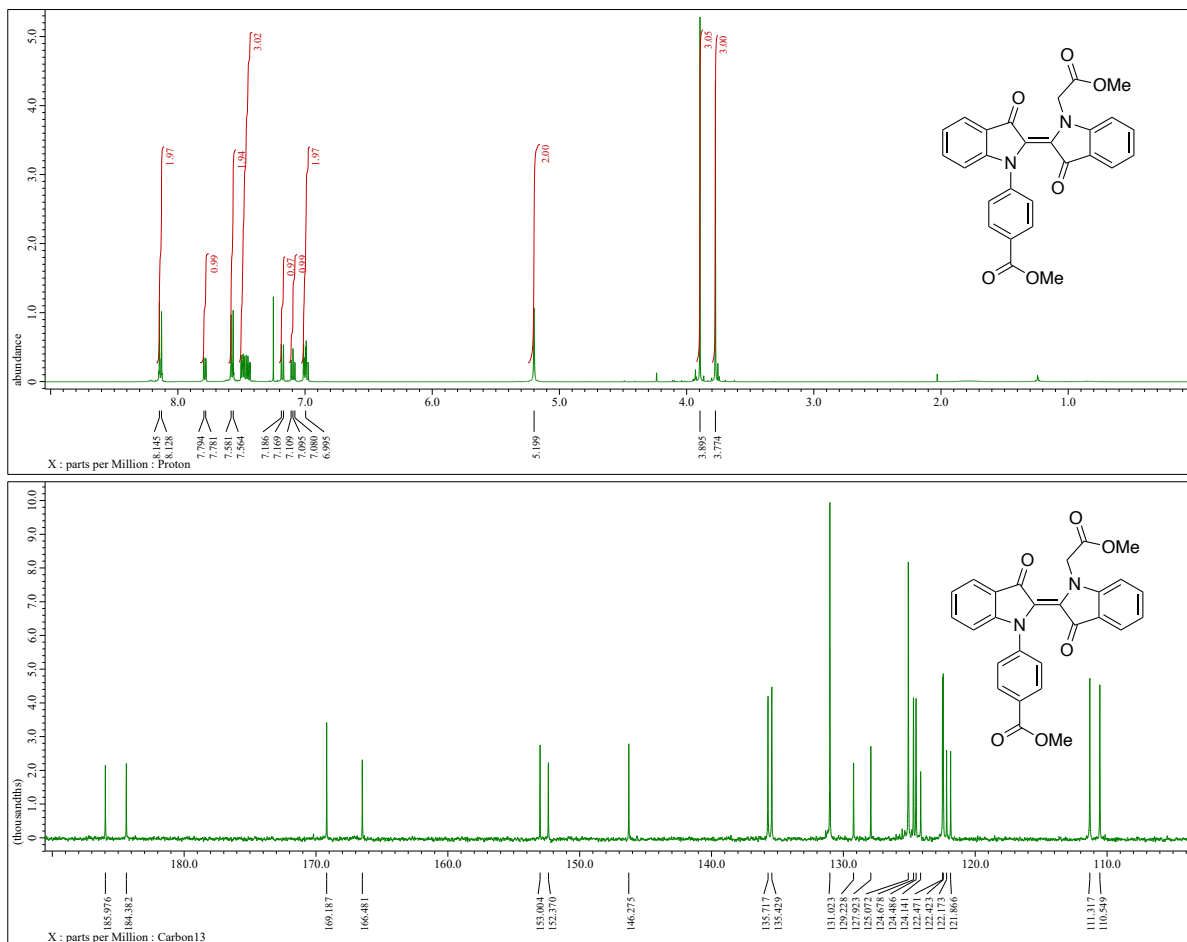

### Al-tBu: Di-*tert*-butyl 2,2'-(3,3'-dioxo-[2,2'-biindolylidene]-1,1'-diyl)(*E*)-diacetate

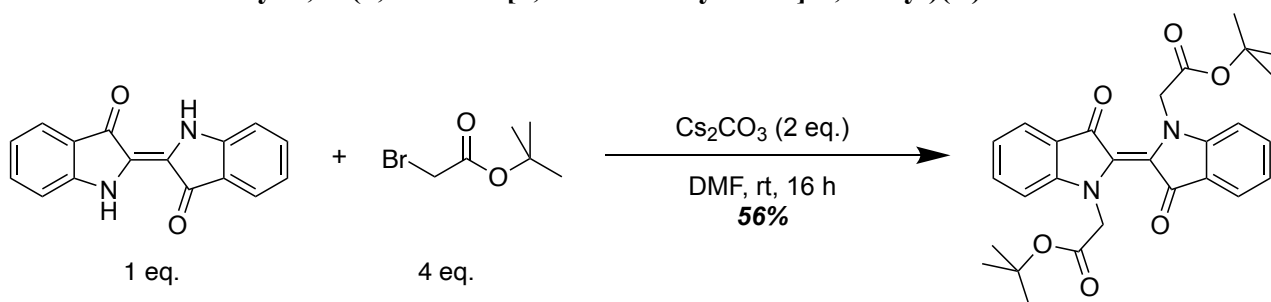

Indigo (1.0 g, 3.85 mmol), *tert*-butyl bromoacetate (2.26 ml, 15.4 mmol) and caesium carbonate (2.5 g, 7.7 mmol) were stirred in *N,N*-dimethylformamide (10 ml) at room temperature overnight. The reaction mixture was filtered through a plug of  $\text{SiO}_2$ , diluted with ethyl acetate, washed twice with brine and twice with water, dried with magnesium sulphate, concentrated and purified by flash column chromatography (pure hexane to 30% ethyl acetate in hexane) to yield **Al-tBu** (810 mg, 56%) as a turquoise solid.  $^1\text{H}$ -NMR (500 MHz,  $\text{CDCl}_3$ )  $\delta$  7.72 (d,  $J = 7.4$  Hz, 2H), 7.51 (t,  $J = 7.7$  Hz, 2H), 7.05 (t,  $J = 7.2$  Hz, 2H), 7.00 (d,  $J = 8.0$  Hz, 2H), 4.73 (s, 4H), 1.38 (s, 18H).  $^{13}\text{C}$ -NMR (126 MHz,

CDCl<sub>3</sub>)  $\delta$  186.3, 167.8, 153.8, 135.6, 127.3, 124.4, 122.1, 121.8, 111.0, 82.3, 51.8, 28.1. HRMS (ESI+):  $m/z$  calcd. for [C<sub>28</sub>H<sub>30</sub>N<sub>2</sub>O<sub>6</sub>+Na<sup>+</sup>]: 513.19961; found: 513.19771.

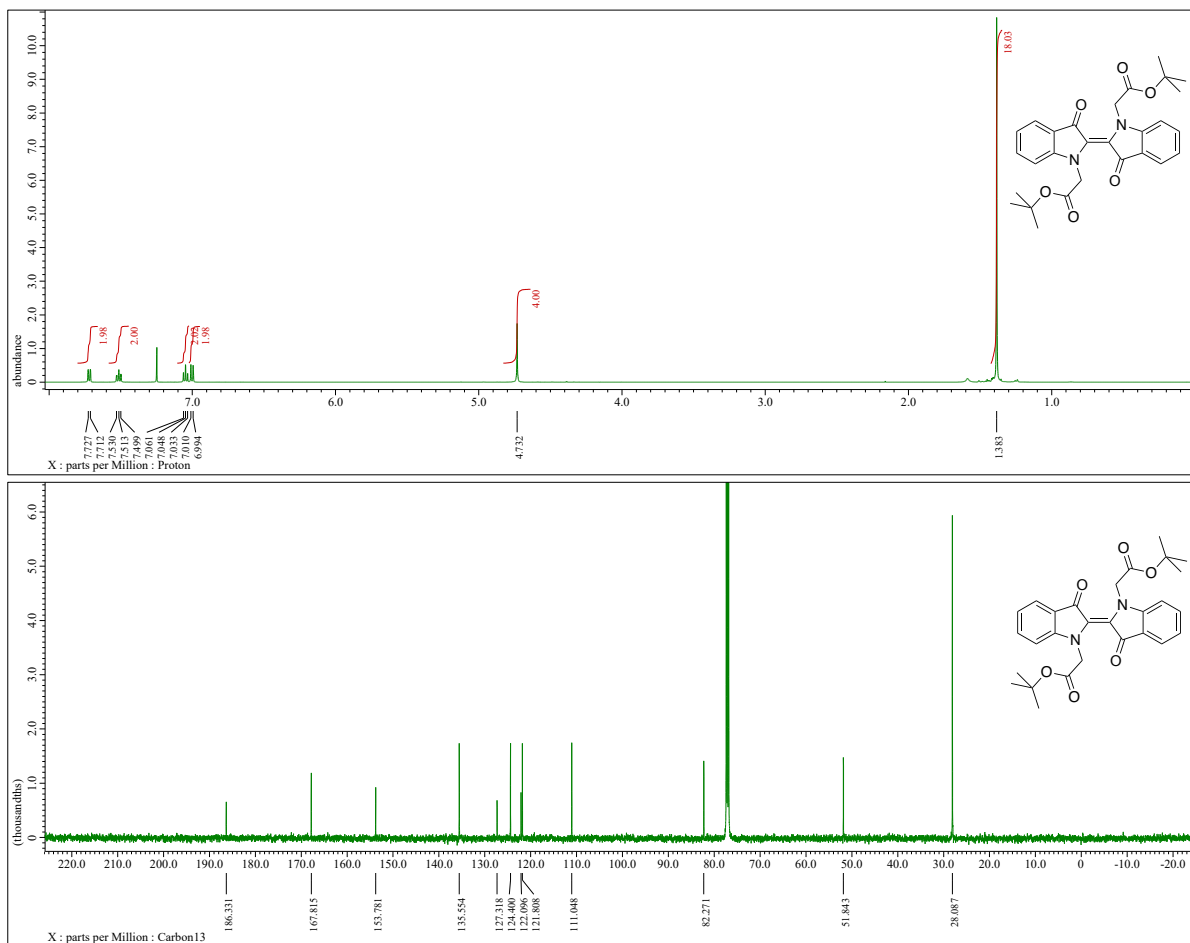

### *Tert*-butyl 4-iodobenzoate

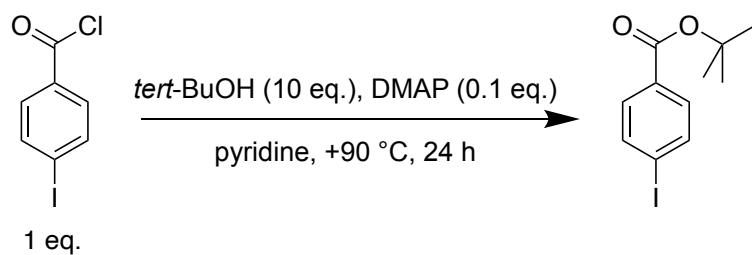

Prepared according to a patent [2]. <sup>1</sup>H-NMR (500 MHz, CDCl<sub>3</sub>)  $\delta$  7.75 (d,  $J$  = 8.6 Hz, 2H), 7.67 (d,  $J$  = 8.6 Hz, 2H), 1.57 (s, 9H).

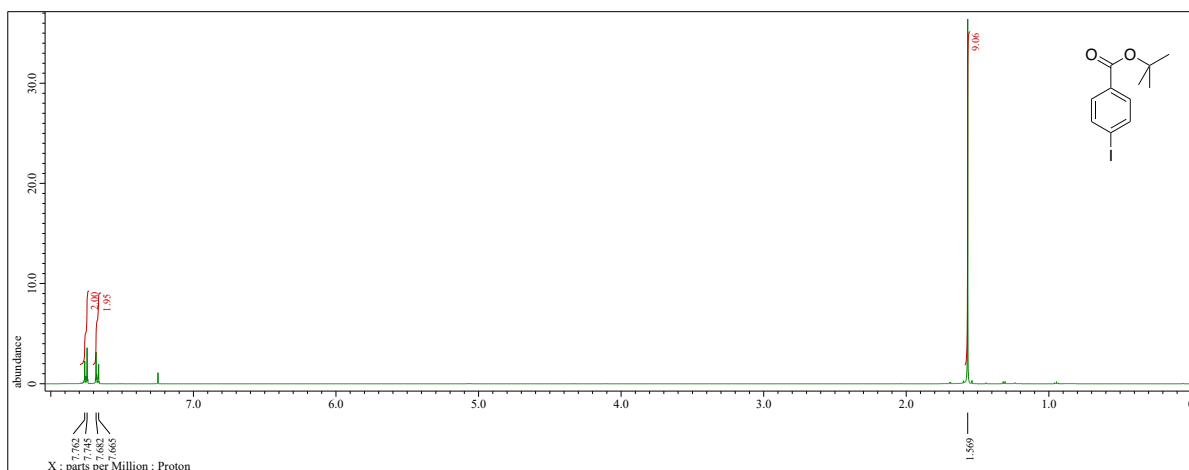

**Ar-tBu and As-tBu-pre: di-tert-butyl 4,4'-(3,3'-dioxo-[2,2'-biindolinylidene]-1,1'-diyl)(E)-dibenzoate and tert-butyl (E)-4-(3,3'-dioxo-[2,2'-biindolinylidene]-1-yl)benzoate**

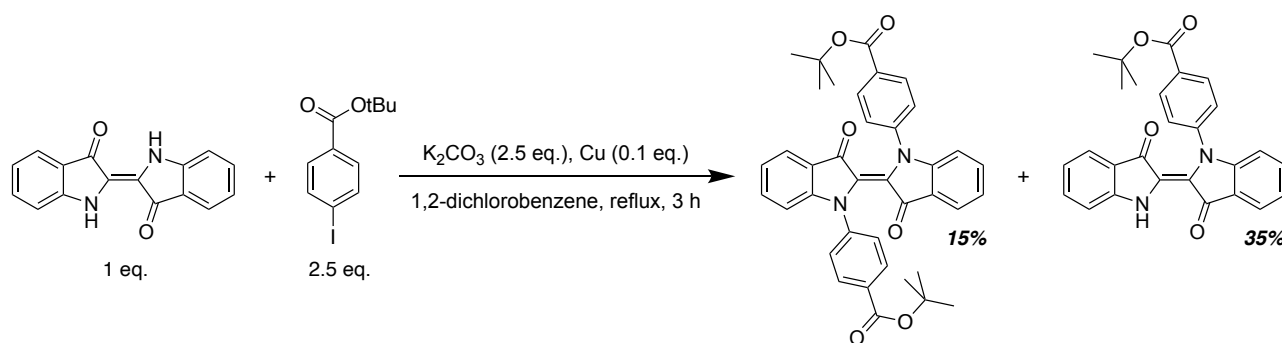

Indigo (309 mg, 1.19 mmol), *tert*-butyl 4-iodobenzoate (566 mg, 1.78 mmol), potassium carbonate (328 mg, 2.38 mmol) and copper powder (7.6 mg, 0.12 mmol) were refluxed in bubble-degassed 1,2-dichlorobenzene (10 ml) under argon for 5 hours. The reaction mixture was then allowed to cool down, filtered through a plug of SiO<sub>2</sub> and purified by flash column chromatography (SiO<sub>2</sub>, 0–10% ethyl acetate in dichloromethane) to yield **Ar-tBu** (98 mg, 15%) and **As-tBu-pre** (181 mg, 35%) as turquoise-blue and deep blue solids. **Ar-tBu**: <sup>1</sup>H-NMR (500 MHz, CDCl<sub>3</sub>) δ 8.17 (d, J = 8.6 Hz, 4H), 7.59 (d, J = 8.0 Hz, 6H), 7.40 (t, J = 7.7 Hz, 2H), 7.07 (d, J = 8.6 Hz, 2H), 7.02 (t, J = 7.4 Hz, 2H), 1.60 (s, 18H). <sup>13</sup>C-NMR (126 MHz, CDCl<sub>3</sub>) δ 184.4, 165.0, 152.7, 145.6, 135.3, 131.0, 130.4, 126.3, 125.2, 124.5, 122.7, 121.8, 111.3, 81.4, 28.3. HRMS (ESI<sup>+</sup>): *m/z* calcd. for [C<sub>38</sub>H<sub>34</sub>N<sub>2</sub>O<sub>6</sub>+Na<sup>+</sup>]: 637.23091; found: 637.23370. Note: the unassigned low-intensity peaks belong to the *Z* isomer that is present in a thermodynamic equilibrium. **As-tBu-pre**: <sup>1</sup>H-NMR (500 MHz, CDCl<sub>3</sub>) δ 10.47 (s, 1H), 8.12 (d, J = 8.6 Hz, 2H), 7.81 (d, J = 7.4 Hz, 1H), 7.48 (d, J = 7.4 Hz, 1H), 7.42 (t, J = 7.7 Hz, 2H), 7.38 (d, J = 8.6 Hz, 2H), 7.07 (t, J = 7.2 Hz, 1H), 6.98 (q, J = 4.0 Hz, 2H), 6.88 (t, J = 7.4 Hz, 1H), 1.61 (s, 9H). <sup>13</sup>C-NMR (126 MHz, CDCl<sub>3</sub>) δ 189.5, 185.9, 165.1, 153.2, 151.5, 144.3, 136.2, 135.7, 130.7, 126.2, 125.9, 124.9, 124.1, 122.0, 121.3, 121.2, 121.1, 120.1, 112.0, 111.6, 81.3, 28.3. HRMS (ESI<sup>+</sup>): *m/z* calcd. for [C<sub>27</sub>H<sub>22</sub>N<sub>2</sub>O<sub>4</sub>+Na<sup>+</sup>]: 461.14718; found: 461.14655.

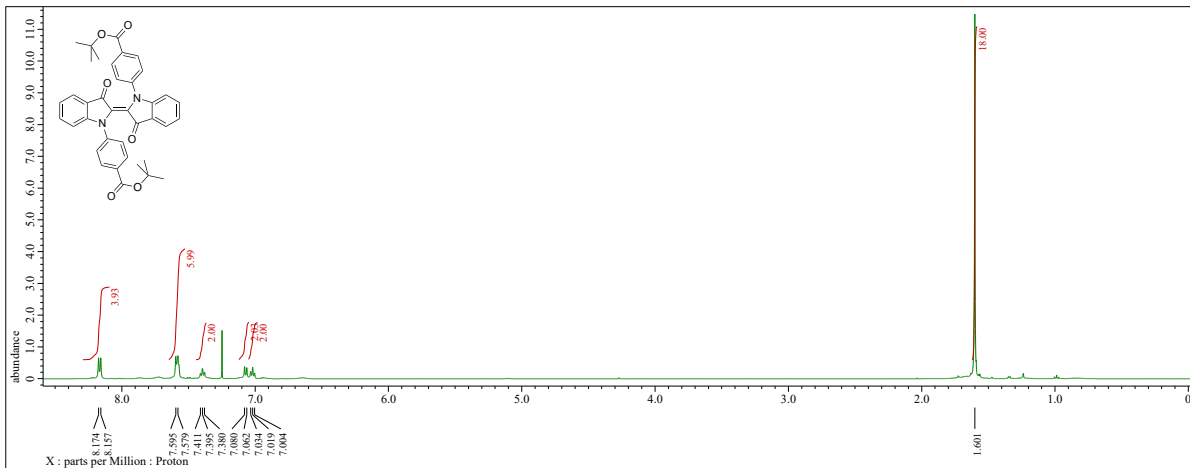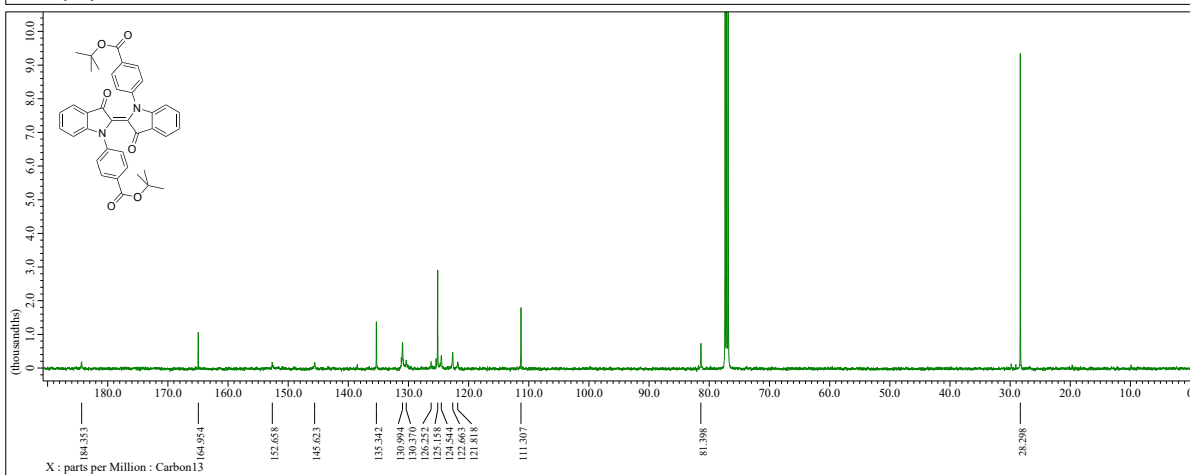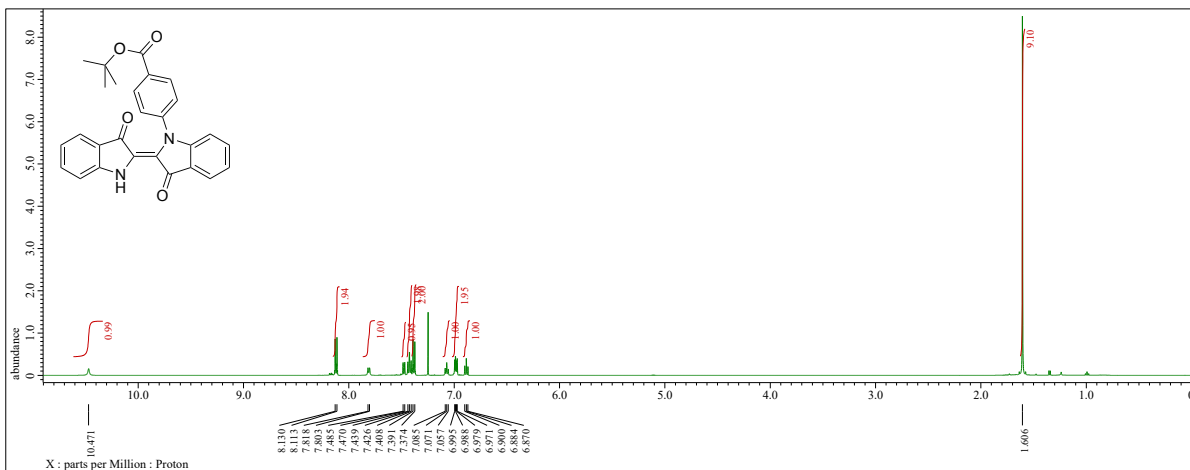

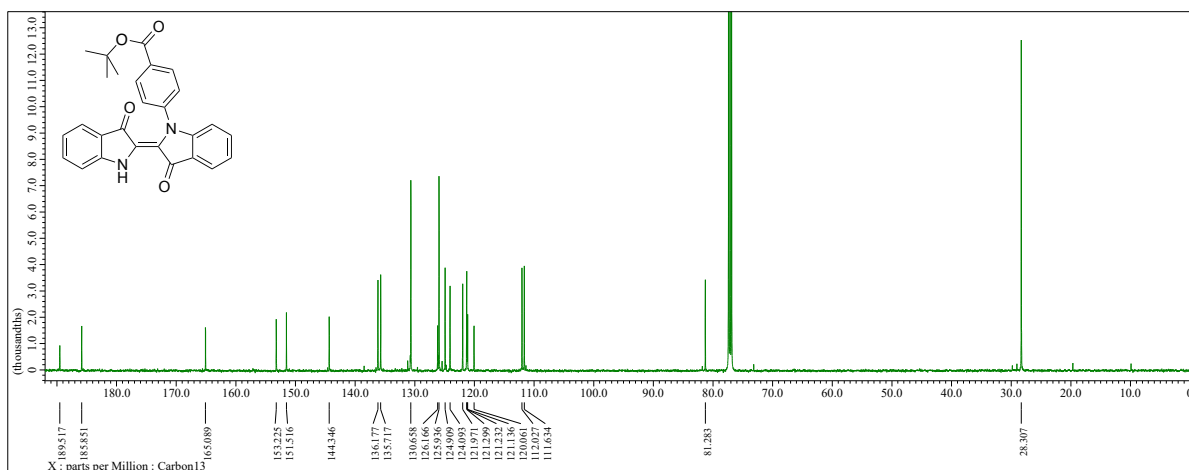

**As-tBu: tert-butyl (E)-4-(1'-(2-(tert-butoxy)-2-oxoethyl)-3,3'-dioxo-[2,2'-biindolinylidene]-1-yl)benzoate**

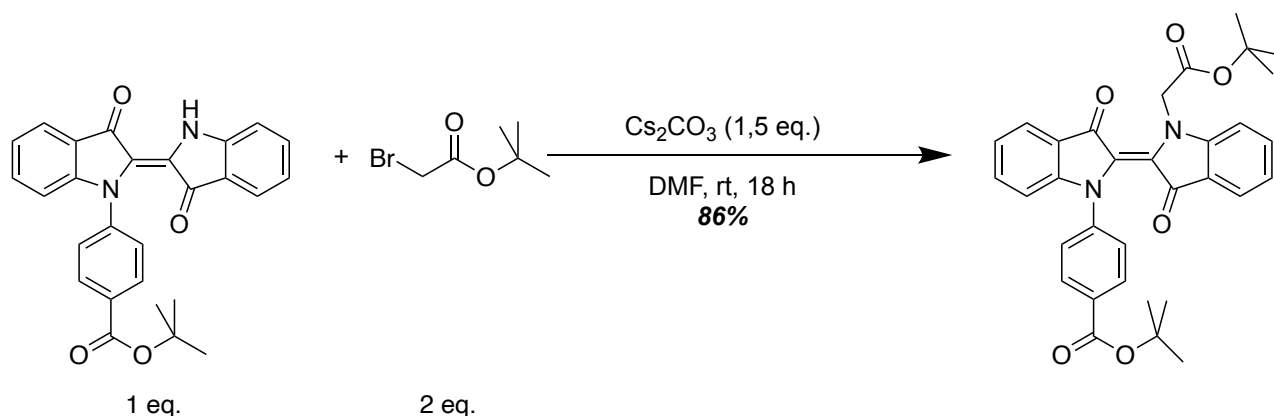

**As-tBu-pre** (148 mg, 0.34 mmol), tert-butyl bromoacetate (100  $\mu\text{l}$ , 0.68 mmol) and caesium carbonate (133 mg, 0.41 mmol) were stirred in dry *N,N*-dimethylformamide (3 ml) overnight. The reaction mixture was then diluted with ethyl acetate, washed with brine, three times with water and again with brine, dried with magnesium sulphate, concentrated and purified by flash column chromatography ( $\text{SiO}_2$ , 0–10% ethyl acetate in dichloromethane) to yield **As-tBu** (160 mg, 86%) as a turquoise-blue solid.  $^1\text{H-NMR}$  (500 MHz,  $\text{CDCl}_3$ )  $\delta$  8.08 (d,  $J = 8.6$  Hz, 2H), 7.79 (d,  $J = 7.4$  Hz, 1H), 7.55–7.42 (m, 5H), 7.18 (d,  $J = 8.0$  Hz, 1H), 7.09 (t,  $J = 7.4$  Hz, 1H), 6.99 (q,  $J = 8.2$  Hz, 2H), 5.07 (s, 2H), 1.58 (s, 9H), 1.40 (s, 9H).  $^{13}\text{C-NMR}$  (126 MHz,  $\text{CDCl}_3$ )  $\delta$  185.8, 184.7, 167.7, 165.1, 153.4, 152.4, 145.9, 135.6, 135.3, 130.8, 129.8, 129.5, 124.8, 124.6, 124.4, 124.2, 122.3, 122.2, 121.9, 111.3, 110.6, 82.8, 81.2, 51.0, 28.3, 28.1. HRMS (ESI<sup>+</sup>):  $m/z$  calcd. for  $[\text{C}_{33}\text{H}_{32}\text{N}_2\text{O}_6+\text{Na}^+]$ : 575.21526; found: 575.21450.



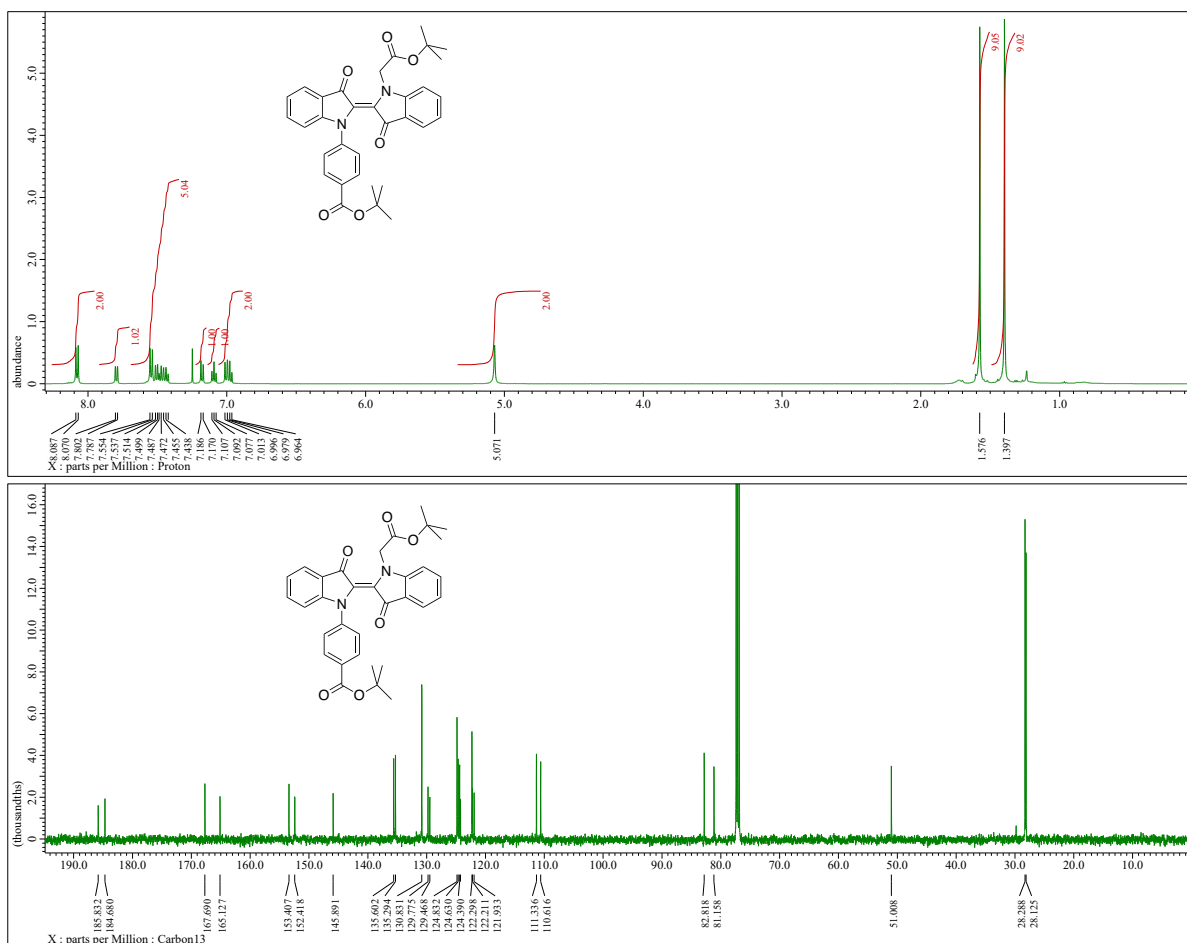

## Photochemical characterisation

UV-visible absorption spectra were recorded with an Agilent Cary 60 spectrophotometer equipped with an Ocean Optics Qpod 2e Peltier-thermostated cell holder whose temperature accuracy is 0.1 °C. Photoexcitation was conducted using a Prior Lumen 1600 light source containing multiple narrow-band LEDs at different wavelengths. The illumination intensities were acquired by measuring the illumination powers with a Coherent LabMax thermal power meter and dividing the number by the area of the cuvette (0.78 cm<sup>2</sup>) or polymer film (0.38 cm<sup>2</sup>) being illuminated. Quartz fluorescence cuvettes with an optical path of 1.0 cm were used for all measurements. Molar absorption coefficients were calculated with the Beer-Lambert law.

Photostationary state (PSS) refers to the mixture of isomers upon constant illumination with a chosen excitation wavelength. Dark, in turn, refers to the mixture of isomers after an elongated period in a dark cavity at room temperature or in an elevated temperature. Based on the thermal relaxation lifetime of the molecules, the time and temperature were chosen so that the dark mixture would consist of molecules only in the *E* state, with the exception of **Ar-Me** that reached an equilibrium with 78% *E* in dark.

Generally, the PSS compositions were determined from the UV-visible spectra by comparing the absorbance values of the pure *E* spectrum and the PSS spectrum in the red end of the *E* isomer absorption band where the *Z* isomer does not absorb, following a previously published method [1]. For **Ar-Me** and **Ar-tBu** the compositions in solution were determined with <sup>1</sup>H NMR spectroscopy by comparing the integrals of two isolated (not overlapping) aromatic two-proton signals originating

from the *E* and *Z* isomers (**Fig. S10**). The photochemical parameters for each compound are presented in **Table 1** in the manuscript and **Table S1** (*vide supra*).

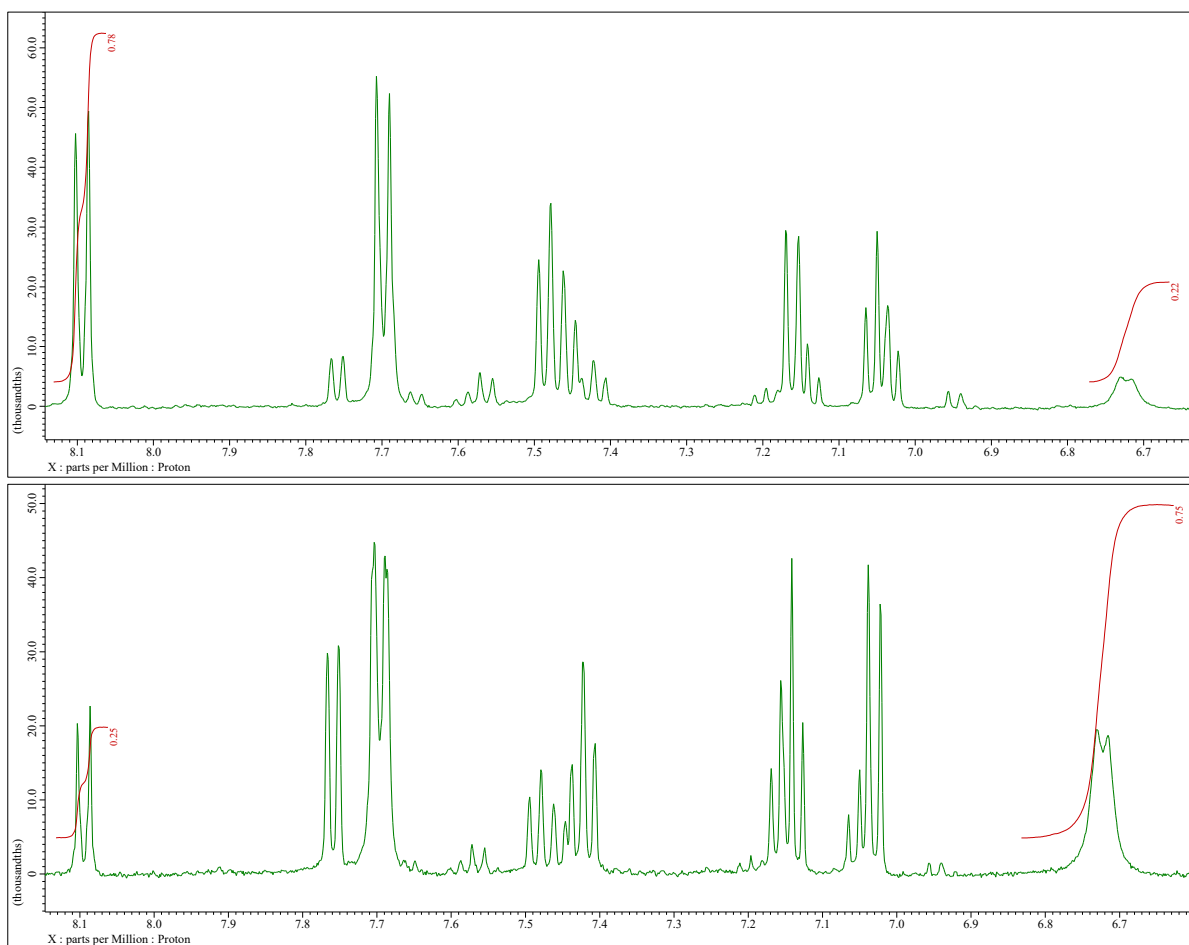

**Figure S10.** <sup>1</sup>H NMR spectra of the aromatic region of *Ar-Me* in dark (top) and under irradiation with 660 nm red light (bottom), showing a change from a dark equilibrium of 78:22 *E*:*Z* to a PSS of 25:75 *E*:*Z*.

## Absorption spectra and PSS

The absorption spectra of the studied indigo derivatives in dilute acetonitrile solutions are presented in **Fig. 1** in the manuscript and **Fig. S4**. The absorption spectra recorded in each polymeric environment are shown below. PSS distributions were calculated from the spectra as described above.

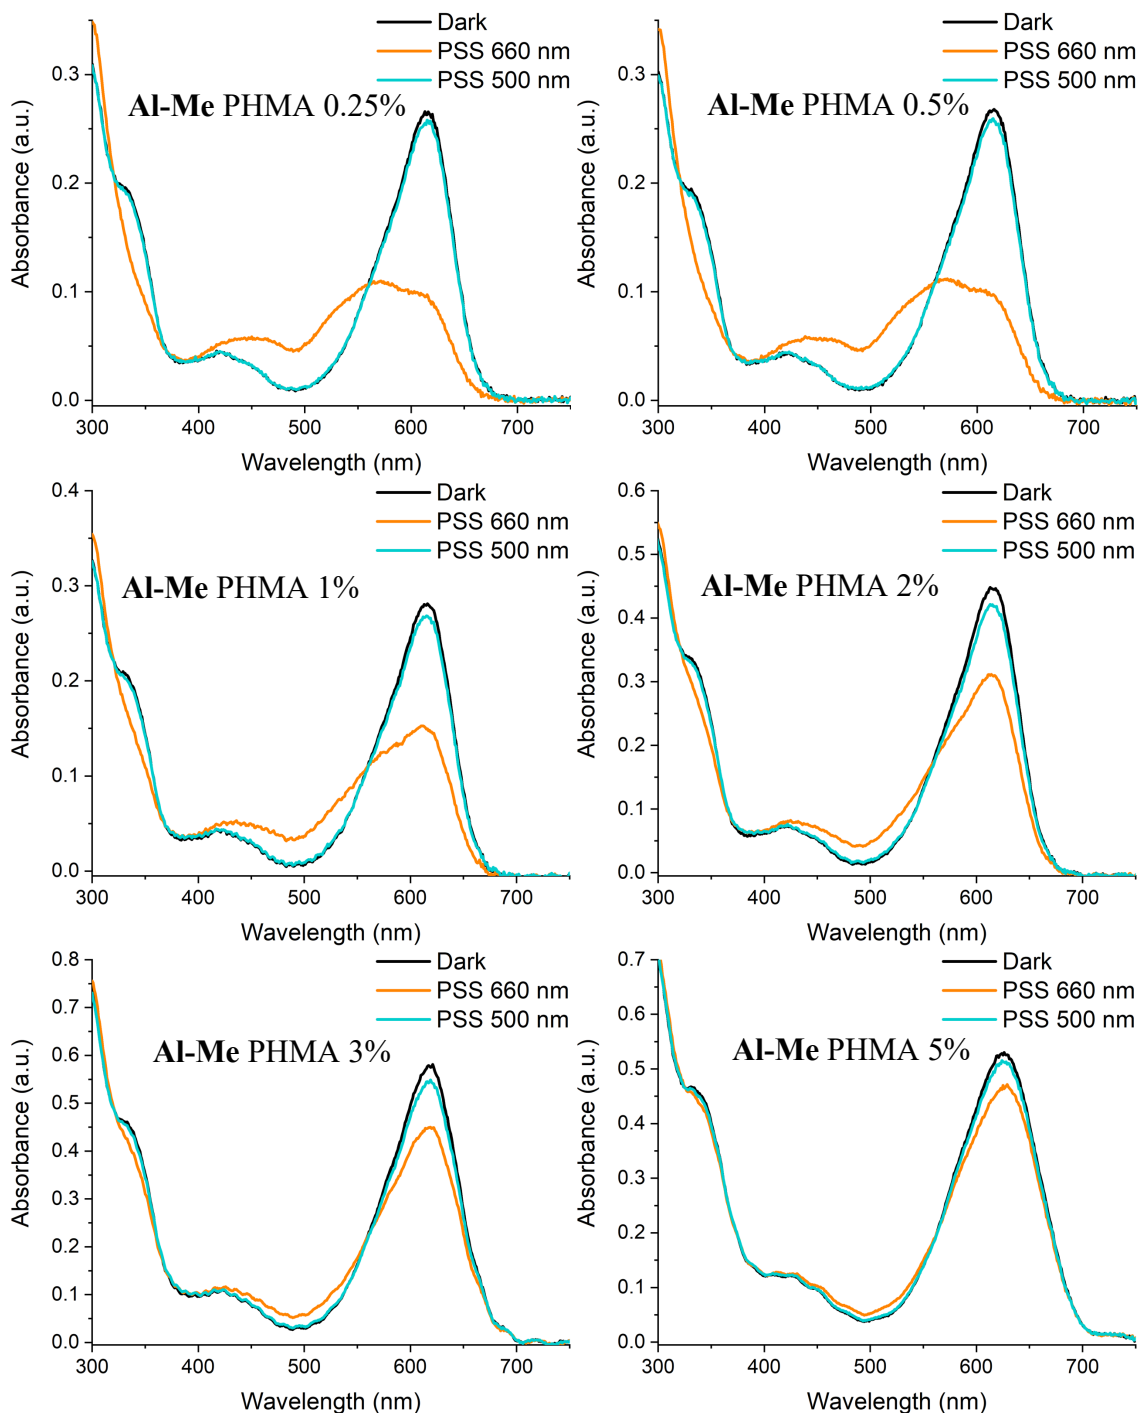

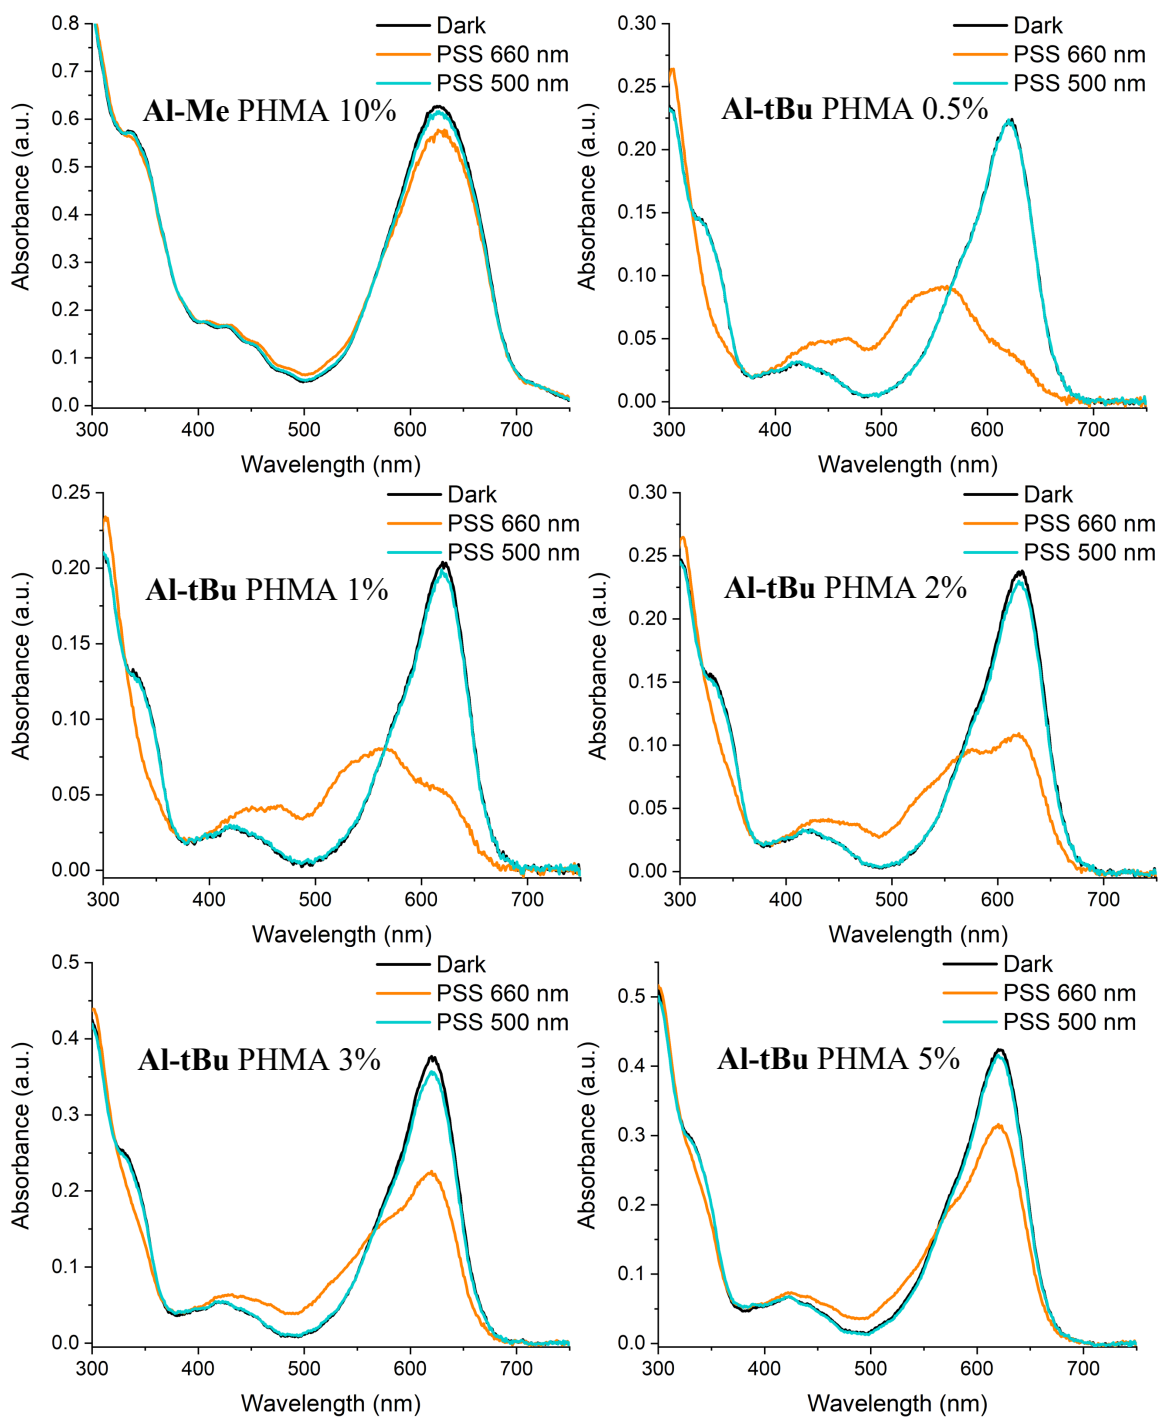

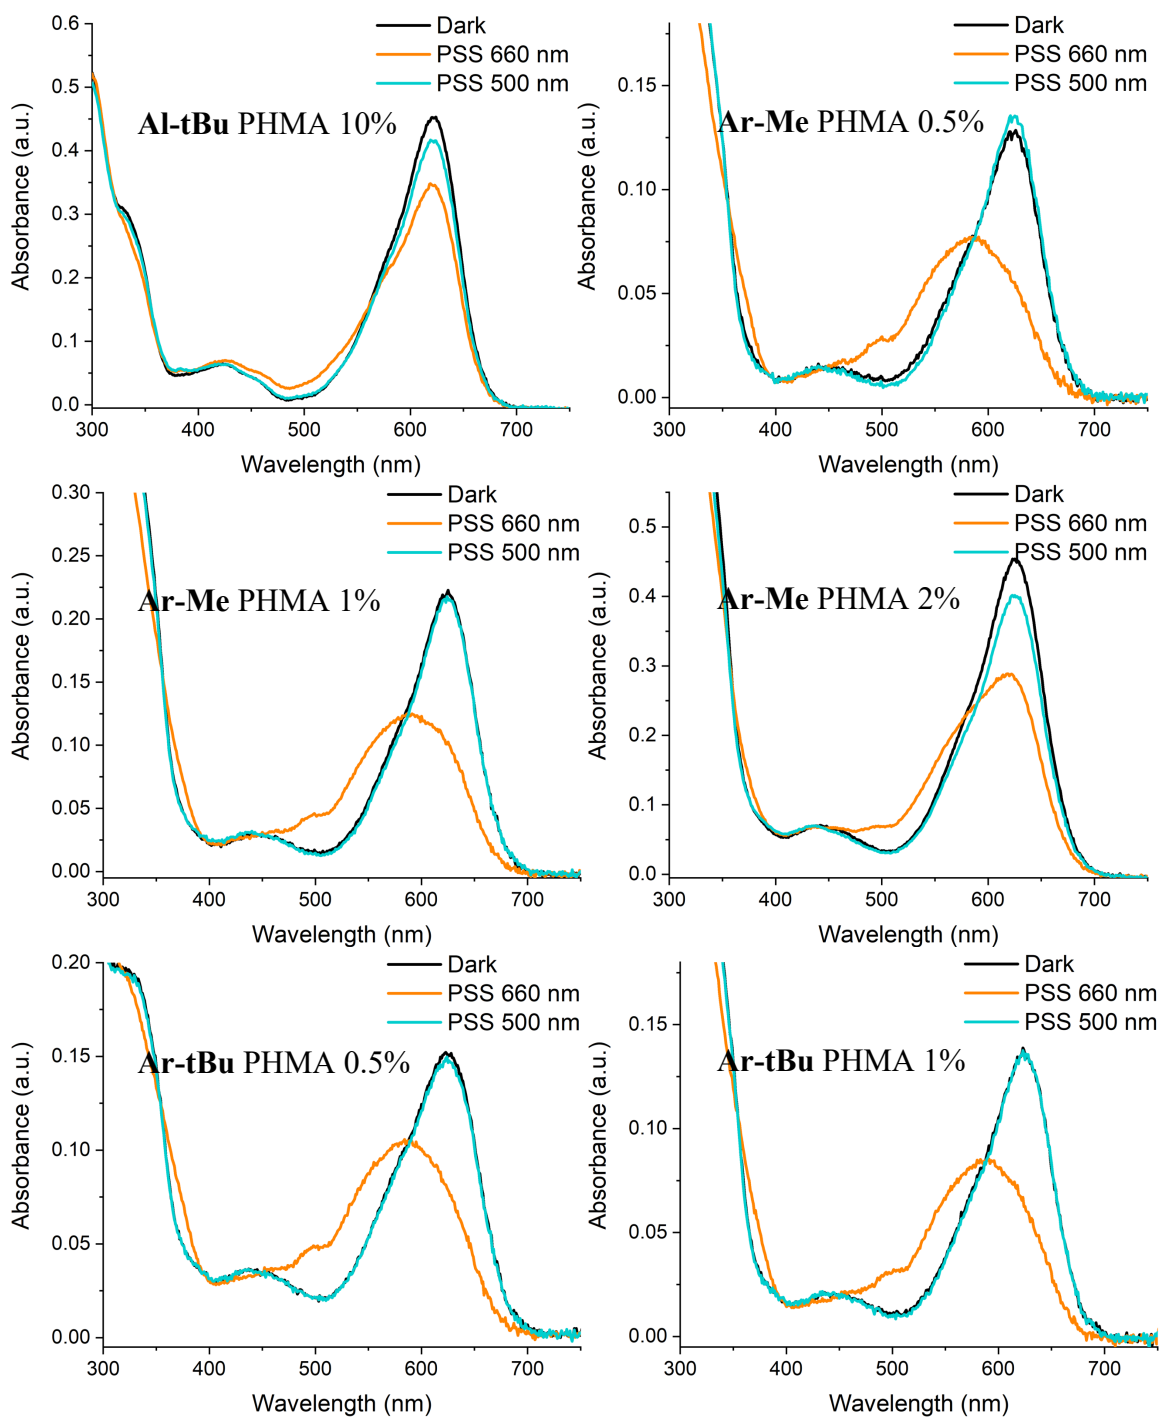

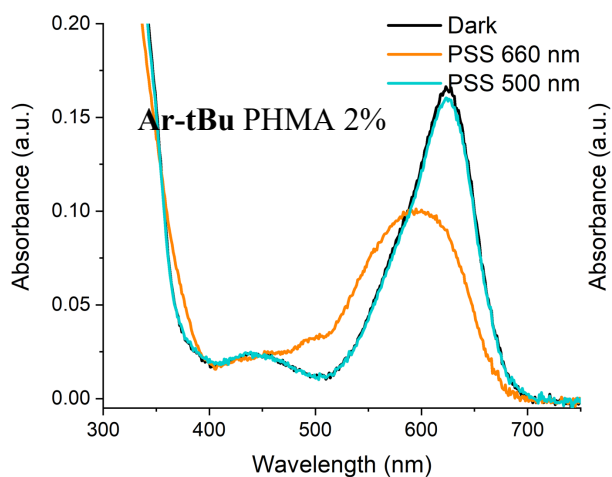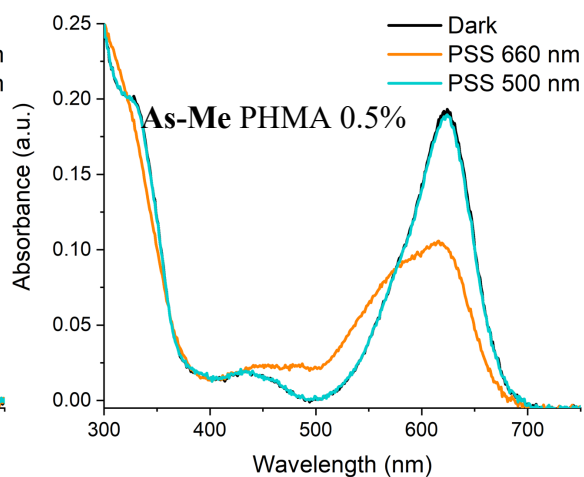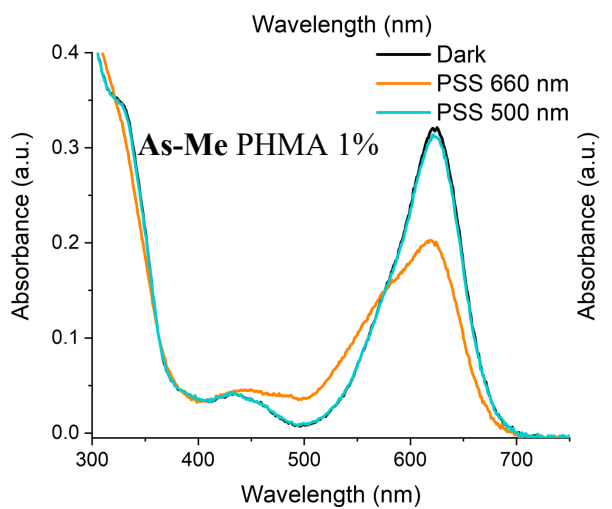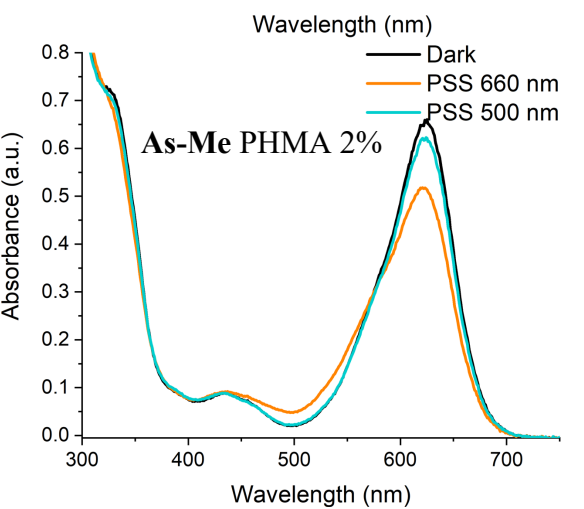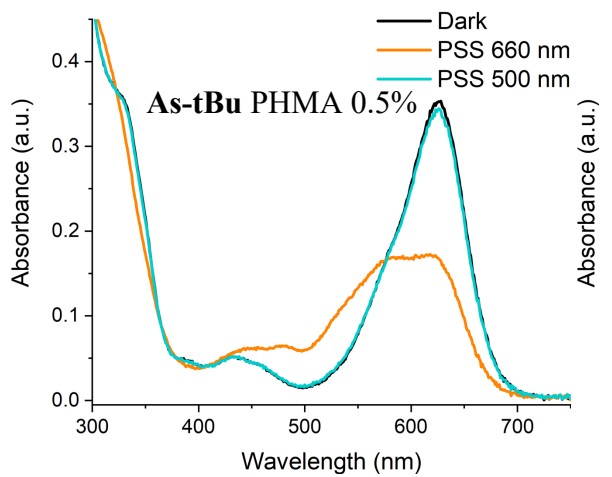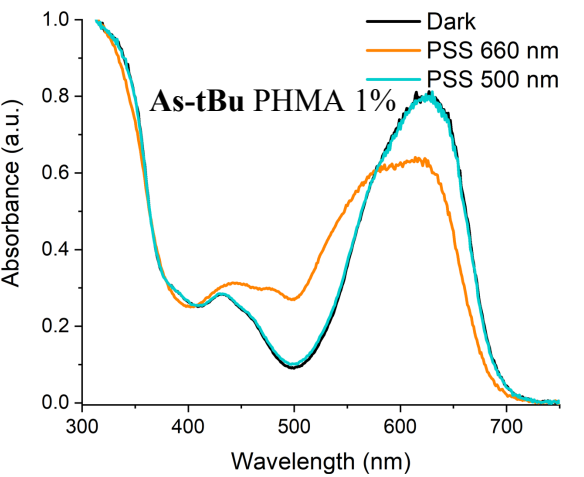

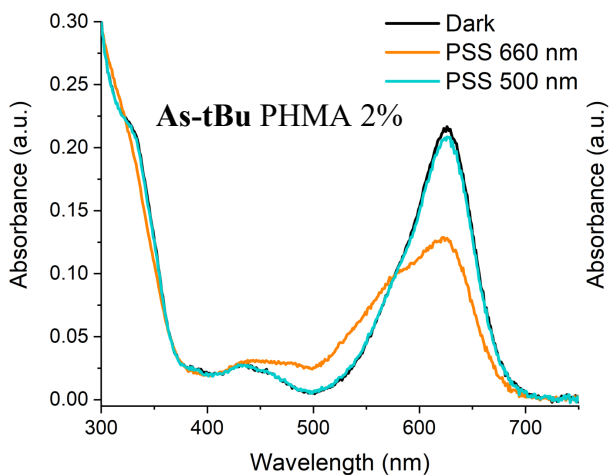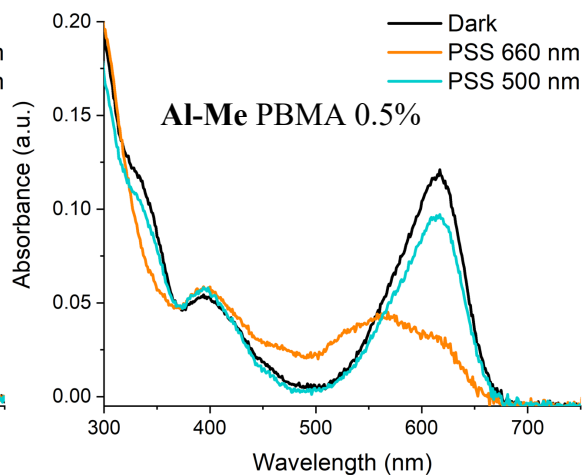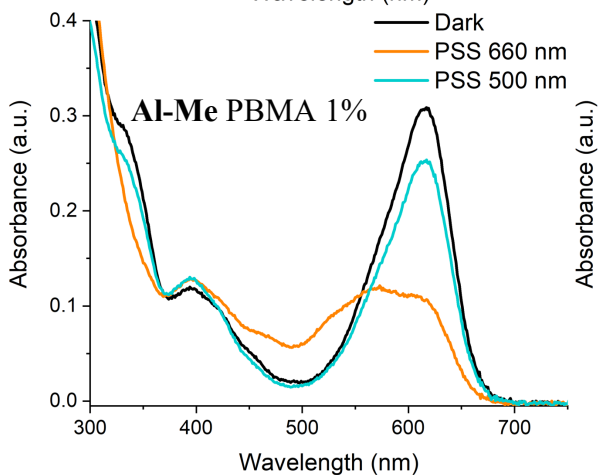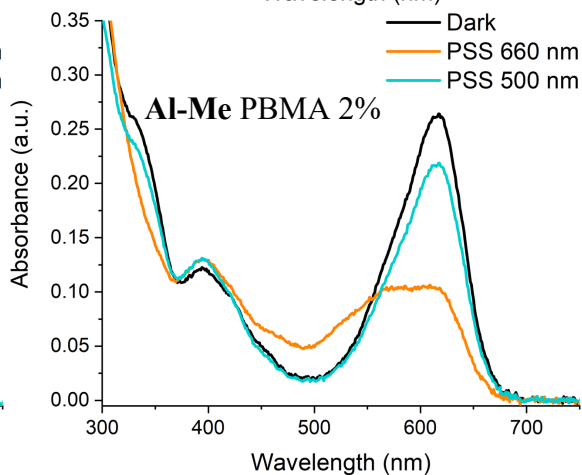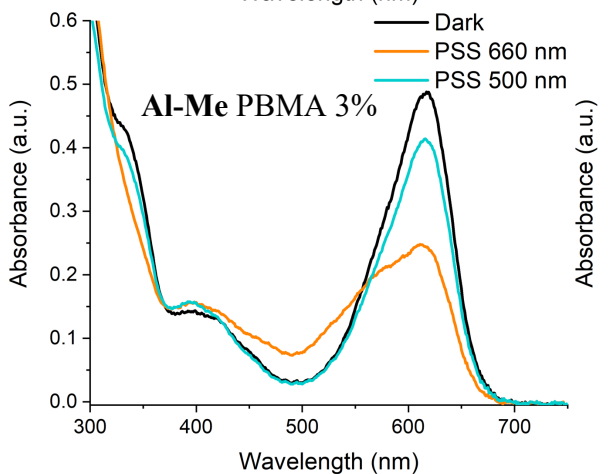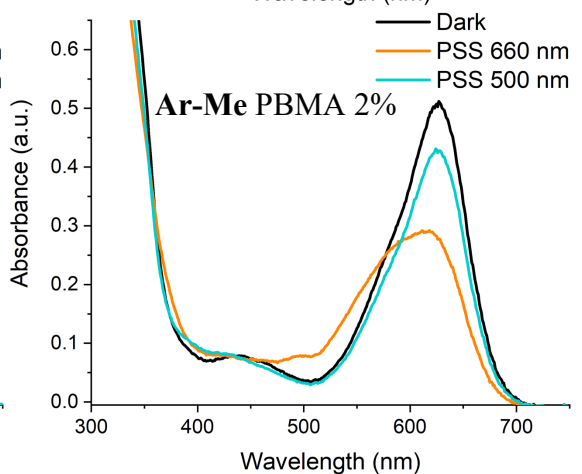

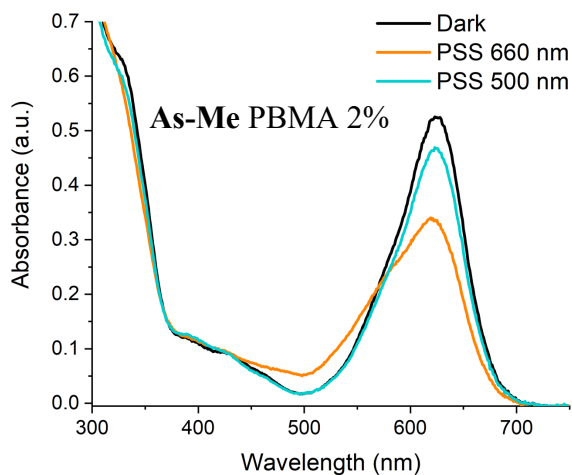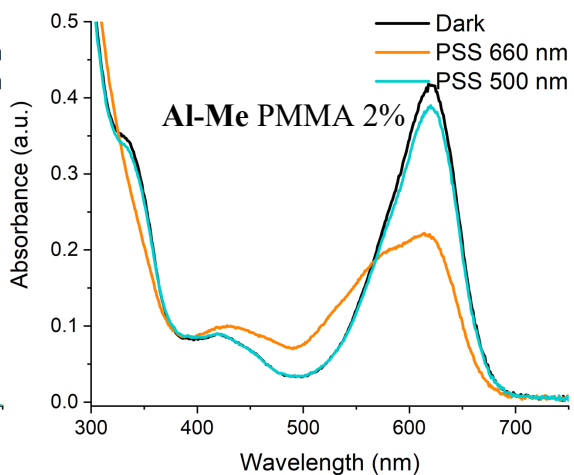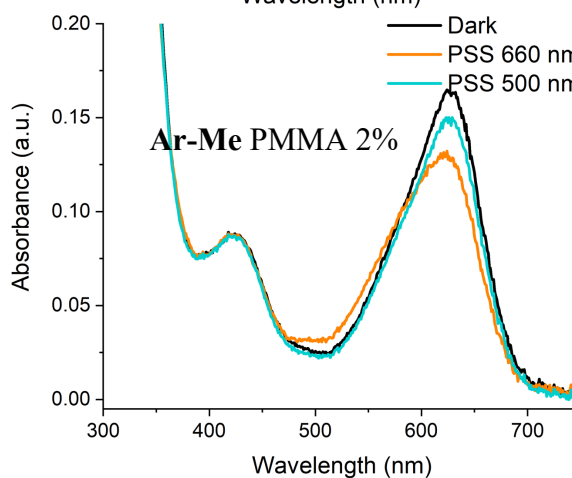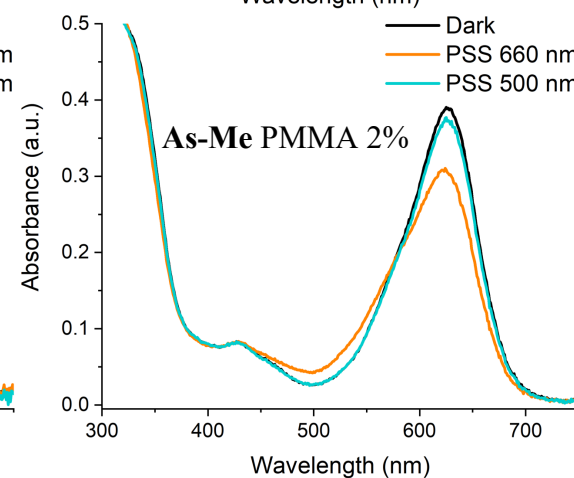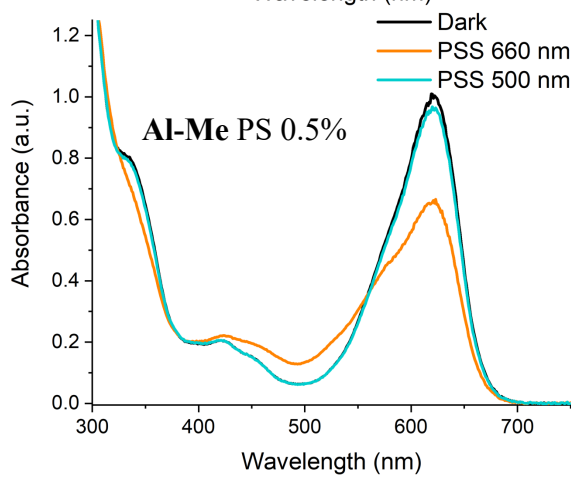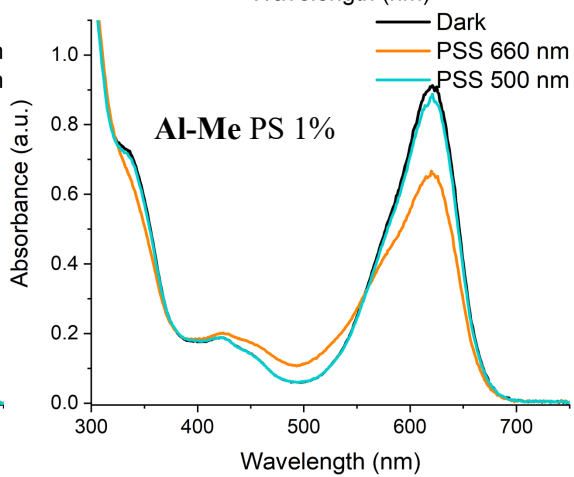



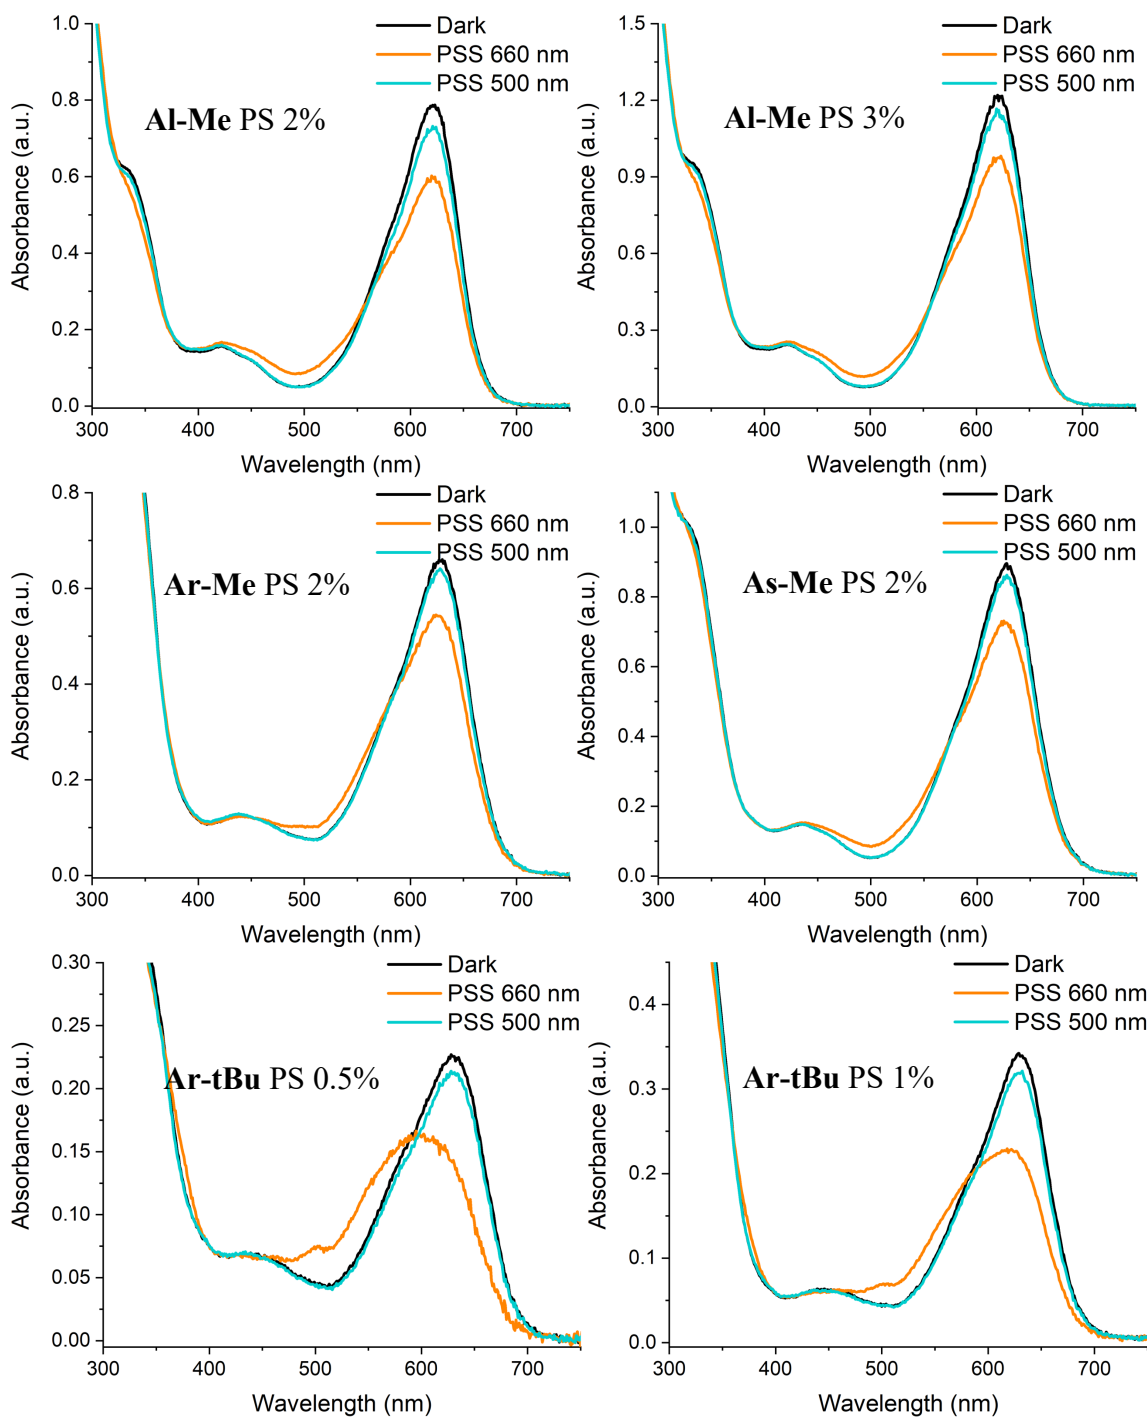

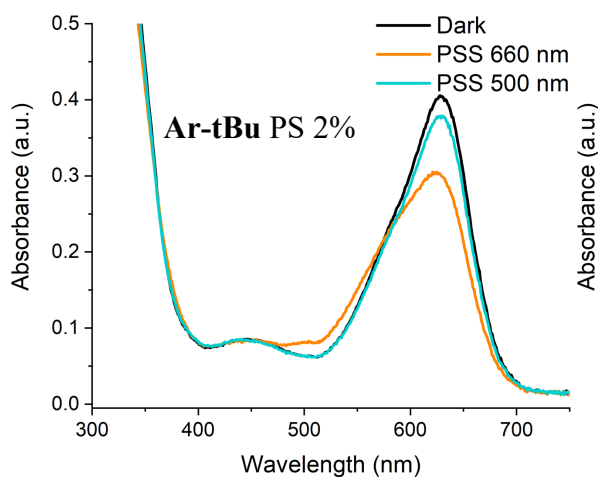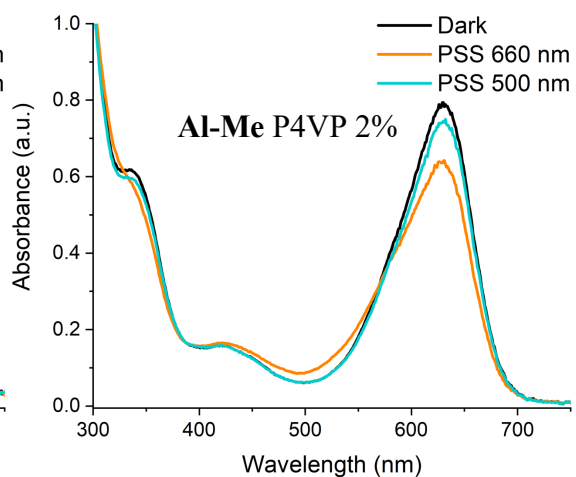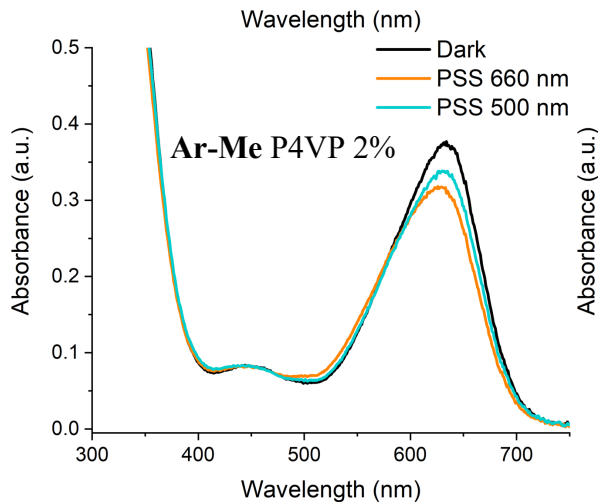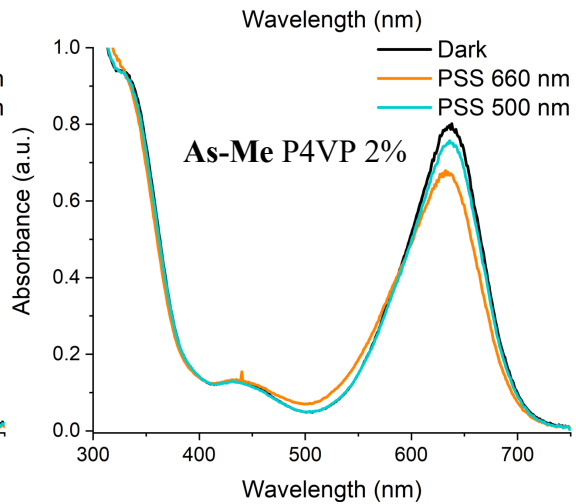

## Thermal isomerisation

In solution, the thermal isomerisation of an indigo derivative from the metastable *Z* isomer to the stable *E* isomer (or to an equilibrium consisting of a mixture of both isomers) follows simple first order reaction kinetics. Thus, a monoexponential decay function can be used to describe the change in the concentration of either isomer over time. The concentration change can most easily be monitored by recording UV-vis spectra over time, since the two isomers have different absorption spectra and absorbance correlates with concentration as per the Beer-Lambert law. In the case of indigos, the spectral changes are largest near the peak of the major absorption band of the *E* isomer located in the red end of the spectrum. Hence, to study the isomerisation kinetics, we monitored the absorbance at 620–635 nm (depending on the indigo derivative) over time and fitted the data with the equation

$$A(t) = A_{\infty} - (A_{\infty} - A_0)e^{\frac{t-t_0}{\tau}}, \quad (\text{Eq. 1})$$

in which  $A(t)$  is the absorbance at time  $t$ ,  $A_{\infty}$  is the absorbance when the thermal isomerisation is complete,  $A_0$  is the absorbance in the beginning of the measurement ( $t_0$ ), and  $\tau$  is the thermal lifetime of the *Z* isomer. It should be noted that this is not equal to the half-life of the isomer, although the latter can easily be calculated from  $\tau$  (see below). Eq. 1 was used to fit the thermal isomerisation of the indigos in solution.

In a polymeric environment the individual indigo molecules do not share a homogenous environment. Instead, the microenvironment can differ greatly between two molecules, which affects their isomerisation. To account for this, we used a so-called stretched exponential function to fit the isomerisation data in polymers. The equation is otherwise similar to the monoexponential equation but contains a factor  $b$ :

$$A(t) = A_{\infty} - (A_{\infty} - A_0)e^{\left(\frac{t-t_0}{\tau}\right)^b} \quad (\text{Eq. 2})$$

The fitting parameters of all thermal isomerisation measurements are presented in **Table S4**. The half-life was calculated from Eq. 1 or 2. For solution studies, Eq. 1 can be used and the half-life is

$$t_{1/2} = \tau \ln(2), \quad (\text{Eq. 3})$$

whereas for the polymer studies, the stretch factor must be accounted for and from Eq. 2:

$$t_{1/2} = \tau (\ln(2))^{1/b}. \quad (\text{Eq. 4})$$

Note that in the fitting graphs, the fitting function is of the form

$$y = y_0 + A e^{\left(\frac{x-x_0}{\tau}\right)^b}, \quad (\text{Eq. 5})$$

so compared to Eq. 2,  $y_0$  is equal to  $A_{\infty}$ ,  $A$  is equal to  $-(A_{\infty} - A_0)$ , and  $x - x_0$  is equal to  $t - t_0$ .

The utility of a stretched exponential fit (as compared to a non-stretched monoexponential fit) is demonstrated by **Figure S11**.

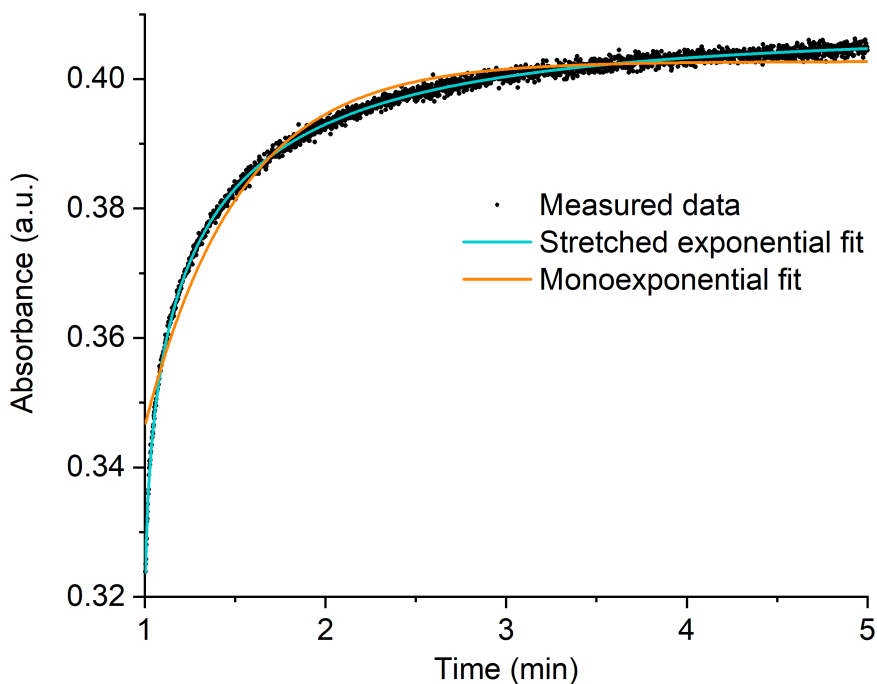

**Figure S11.** A comparison of a stretched exponential fit and a monoexponential fit (*Al-tBu* in PHMA, 10%). Here, the stretch factor  $b$  is 0.47. The stretched function performs better especially in the beginning of the isomerisation.

In one case (*Ar-Me* in P4VP, 2%) we were not able to get a satisfactory fit with the stretched exponential function. In this case, we used a biexponential fit to be able to present a reasonable half-life:

$$A(t) = A_{\infty} + A_1 e^{-\frac{t-t_0}{\tau_1}} + A_2 e^{-\frac{t-t_0}{\tau_2}} \quad (\text{Eq. 6})$$

For discussion purposes, the energy differences between thermal isomerisation barriers ( $\Delta\Delta G^{\ddagger}$ ) were approximated using the Eyring equation, with the approximation of  $\kappa = 1$ :

$$\Delta G^{\ddagger} = RT \ln \left( \frac{kh}{k_B T \kappa} \right) \quad (\text{Eq. 7})$$

Here,  $k$  is the fitted rate constant,  $h$  is the Planck constant,  $k_B$  is the Boltzmann constant, and  $T$  is temperature.

**Table S3.** Fitting parameters of thermal isomerisation for each polymer–indigo combination: the constant  $A_{\infty}$  ( $y_0$  in the fits), preexponential factor  $A$ , the lifetime  $\tau$ , goodness of fit value  $R^2$ , stretch factor  $b$ , and thermal half-life  $t_{1/2}$ . See the text above for the explanations of each parameter.

|        |      | <i>Cindigo</i> | $A_{\infty}$ | $A$      | $\tau$ (min)       | $R^2$   | $b$     | $t_{1/2}$ (min)   |
|--------|------|----------------|--------------|----------|--------------------|---------|---------|-------------------|
| Al-Me  | MeCN | 50 $\mu$ M     | 0.71072      | -1.52166 | 2.08 $\pm$ 0.001   | 0.99997 | 1       | 1.441             |
| Ar-Me  | MeCN | 50 $\mu$ M     | 0.42871      | -0.17257 | 58.87 $\pm$ 2.644  | 0.99889 | 1       | 40.806            |
| As-Me  | MeCN | 50 $\mu$ M     | 0.63301      | -0.35473 | 5.49 $\pm$ 0.049   | 0.99934 | 1       | 3.807             |
| Al-tBu | MeCN | 50 $\mu$ M     | 0.7004       | -0.9998  | 3.55 $\pm$ 0.001   | 0.99998 | 1       | 2.459             |
| Ar-tBu | MeCN | 50 $\mu$ M     | 0.68958      | -0.34618 | 37.5 $\pm$ 0.317   | 0.99891 | 1       | 25.99             |
| As-tBu | MeCN | 50 $\mu$ M     | 0.58559      | -0.35762 | 5.56 $\pm$ 0.043   | 0.99949 | 1       | 3.857             |
| Al-Me  | P4VP | 2 %            | 0.24716      | -0.02598 | 2.71 $\pm$ 0.964   | 0.97444 | 0.48368 | 1.27              |
| Ar-Me  | P4VP | 2 %            | 0.34024      | -0.02537 | 615 $\pm$ 2040     | 0.98569 | 0.26895 | 10.9 <sup>a</sup> |
| As-Me  | P4VP | 2 %            | 0.73168      | -0.06764 | 25.59 $\pm$ 18.50  | 0.99244 | 0.3467  | 8.89              |
| Al-Me  | PS   | 2 %            | 0.82319      | -0.20667 | 2.24 $\pm$ 0.351   | 0.99535 | 0.27593 | 0.593             |
| Ar-Me  | PS   | 2 %            | 0.6068       | -0.06965 | 70.85 $\pm$ 74.464 | 0.97484 | 0.41615 | 29.365            |
| As-Me  | PS   | 2 %            | 0.87818      | -0.13929 | 31.78 $\pm$ 0.101  | 0.99798 | 0.40033 | 12.723            |
| Ar-tBu | PS   | 0.5 %          | 0.14224      | -0.06028 | 894 $\pm$ 146      | 0.99394 | 0.86159 | 584.227           |
| Al-Me  | PMMA | 2 %            | 0.34921      | -0.11194 | 1.23 $\pm$ 0.006   | 0.99983 | 0.59877 | 0.667             |
| Ar-Me  | PMMA | 2 %            | 0.14217      | -0.01202 | 34.84 $\pm$ 10.311 | 0.98321 | 0.79508 | 21.971            |
| As-Me  | PMMA | 2 %            | 0.24709      | -0.04192 | 7.6 $\pm$ 0.088    | 0.98389 | 0.65178 | 4.33              |
| Al-Me  | PBMA | 2 %            | 0.25544      | -0.14154 | 1.28 $\pm$ 0.001   | 0.99988 | 0.89488 | 0.847             |
| Ar-Me  | PBMA | 2 %            | 0.39023      | -0.12838 | 153.9 $\pm$ 23.3   | 0.99799 | 0.88744 | 101.822           |
| As-Me  | PBMA | 2 %            | 0.50557      | -0.13231 | 12.95 $\pm$ 4.186  | 0.99626 | 0.84497 | 8.392             |
| Al-Me  | PHMA | 0.25 %         | 0.24794      | -0.15709 | 0.94 $\pm$ 0.001   | 0.99978 | 0.80766 | 0.599             |
| Al-Me  | PHMA | 0.5 %          | 0.25198      | -0.16489 | 1.01 $\pm$ 0.001   | 0.99981 | 0.83116 | 0.647             |
| Al-Me  | PHMA | 1 %            | 0.28638      | -0.13472 | 0.6 $\pm$ 0.001    | 0.99943 | 0.68677 | 0.351             |
| Al-Me  | PHMA | 2 %            | 0.40887      | -0.13934 | 0.41 $\pm$ 0.002   | 0.99921 | 0.57863 | 0.215             |
| Al-Me  | PHMA | 3 %            | 0.5455       | -0.16865 | 0.08 $\pm$ 0.006   | 0.99738 | 0.4225  | 0.036             |
| Al-Me  | PHMA | 5 %            | 0.52333      | -0.0953  | 0.05 $\pm$ 0.007   | 0.97926 | 0.31335 | 0.016             |
| Al-Me  | PHMA | 10 %           | 0.60306      | -0.05393 | 0.05 $\pm$ 0.017   | 0.98669 | 0.12141 | 0.002             |
| Al-tBu | PHMA | 0.5 %          | 0.24129      | -0.19609 | 6.9 $\pm$ 0.017    | 0.9999  | 0.88234 | 4.553             |
| Al-tBu | PHMA | 1 %            | 0.20389      | -0.15624 | 5.49 $\pm$ 0.006   | 0.99985 | 0.72658 | 3.318             |
| Al-tBu | PHMA | 2 %            | 0.22873      | -0.12711 | 3.07 $\pm$ 0.005   | 0.99957 | 0.60718 | 1.679             |
| Al-tBu | PHMA | 3 %            | 0.35904      | -0.15005 | 1.17 $\pm$ 0.003   | 0.99942 | 0.55716 | 0.608             |
| Al-tBu | PHMA | 5 %            | 0.44723      | -0.13838 | 0.69 $\pm$ 0.003   | 0.99894 | 0.47069 | 0.318             |
| Al-tBu | PHMA | 10 %           | 0.40716      | -0.09667 | 0.25 $\pm$ 0.003   | 0.99749 | 0.46733 | 0.113             |
| Ar-Me  | PHMA | 2 %            | 0.38218      | -0.12528 | 69.65 $\pm$ 4.695  | 0.99868 | 0.86715 | 45.643            |
| As-Me  | PHMA | 2 %            | 1.00463      | -0.11551 | 2.28 $\pm$ 0.02    | 0.9973  | 0.43749 | 0.986             |

<sup>a</sup> Half-life calculated from a biexponential fit  $A(t) = 0.32953 - 0.0064e^{\frac{t-0.5 \text{ min}}{1.37502 \text{ min}}} - 0.00789e^{\frac{t-0.5 \text{ min}}{109.587 \text{ min}}}$

The thermal isomerisation graphs are shown below.

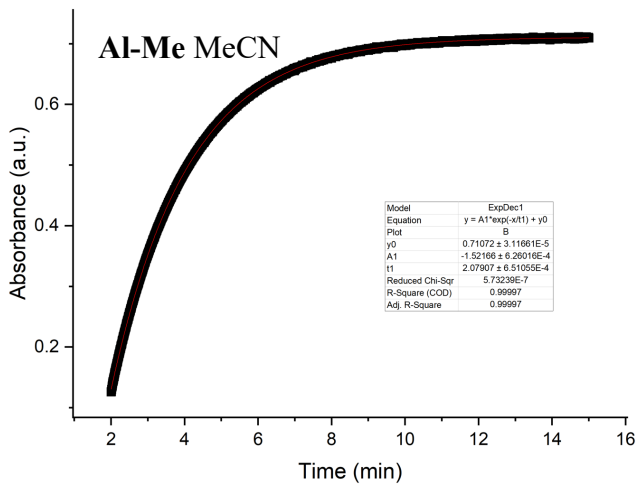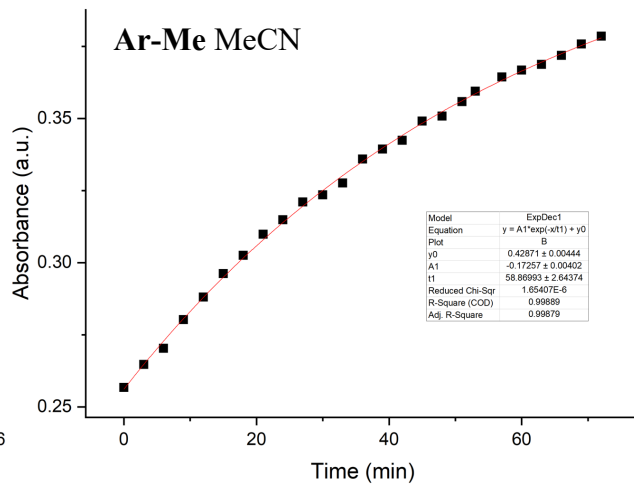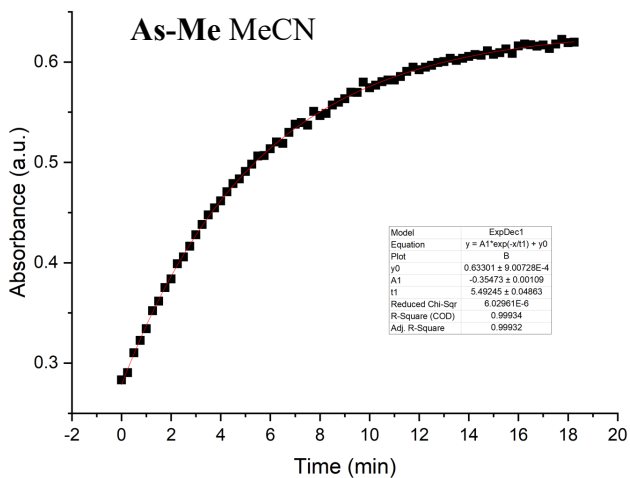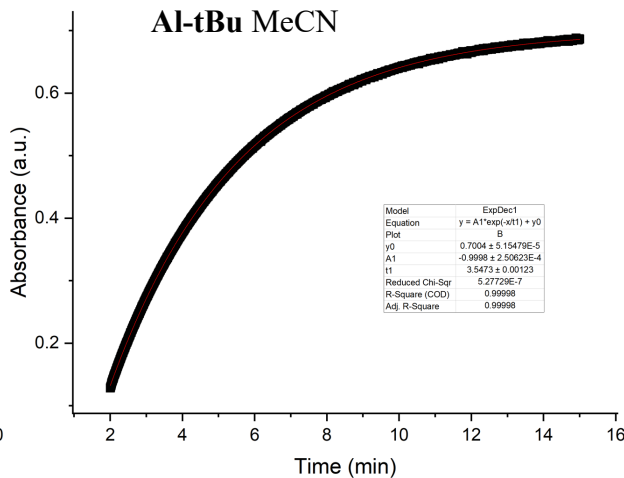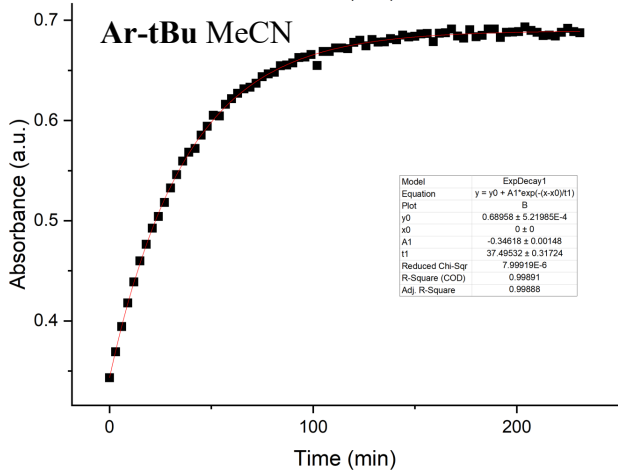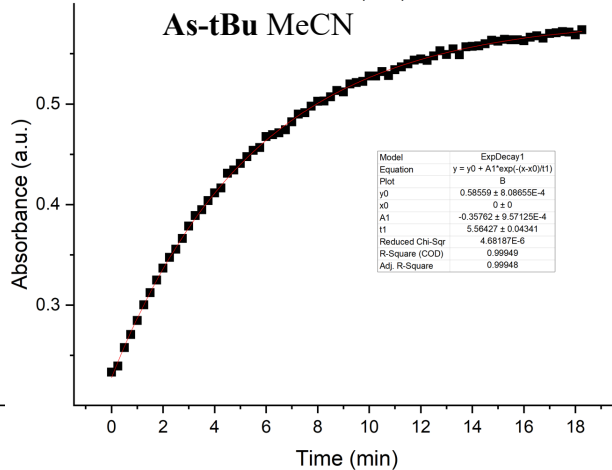

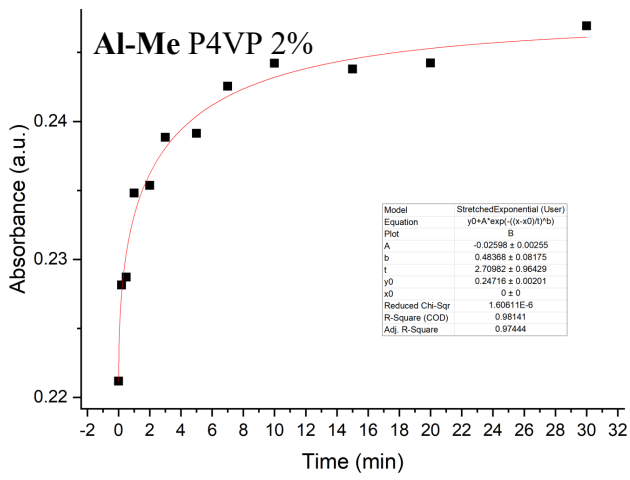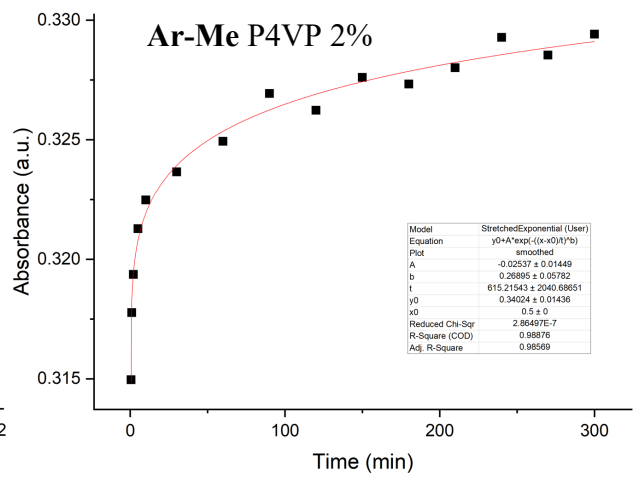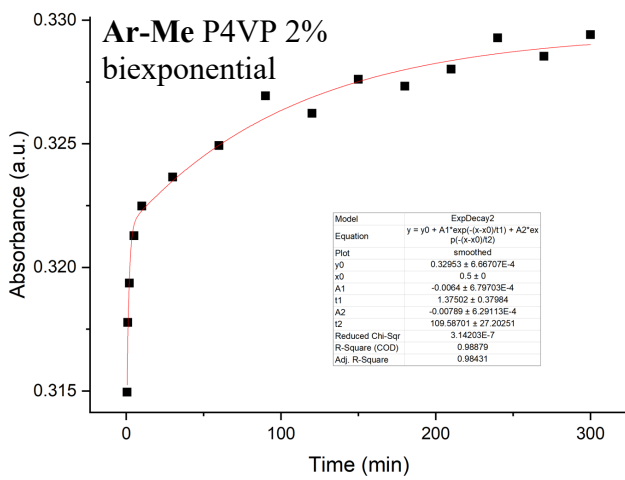

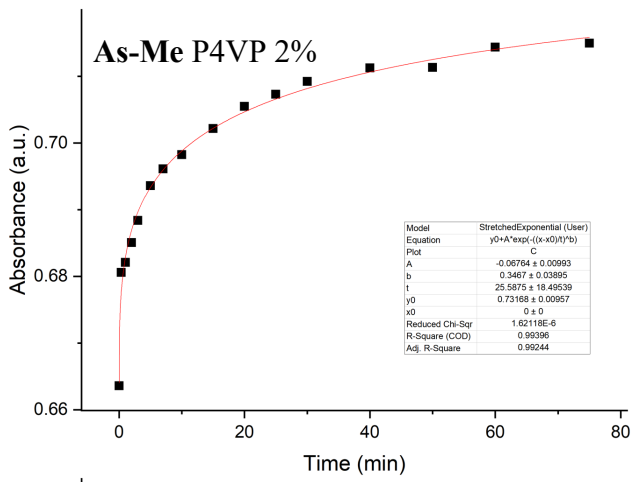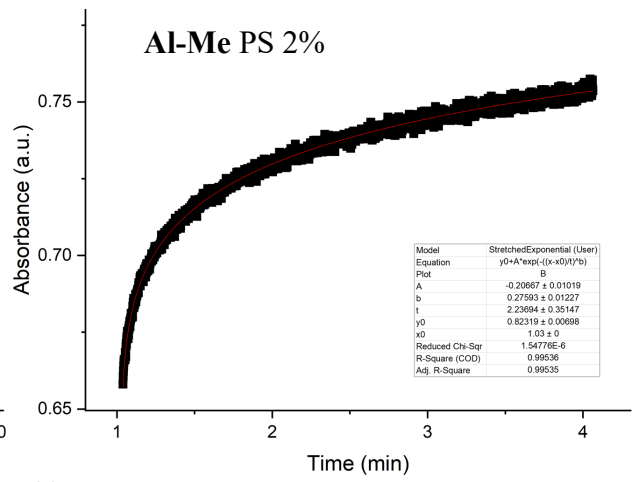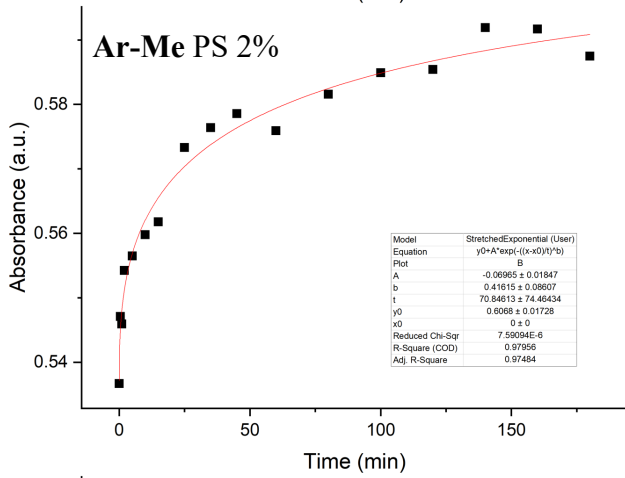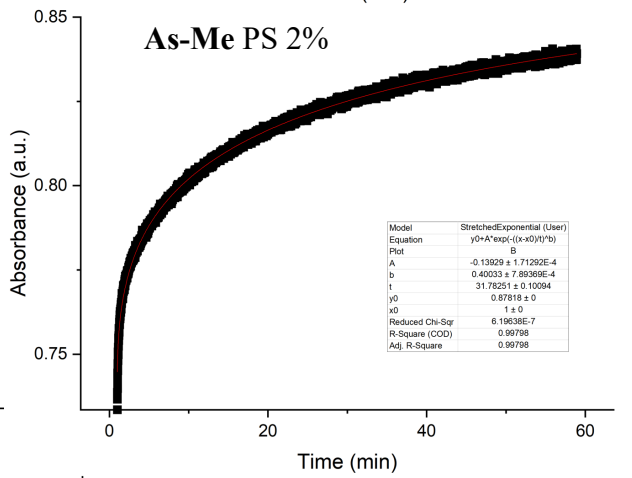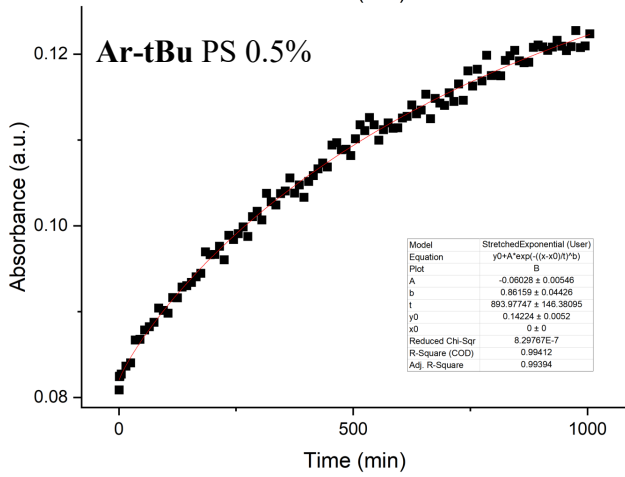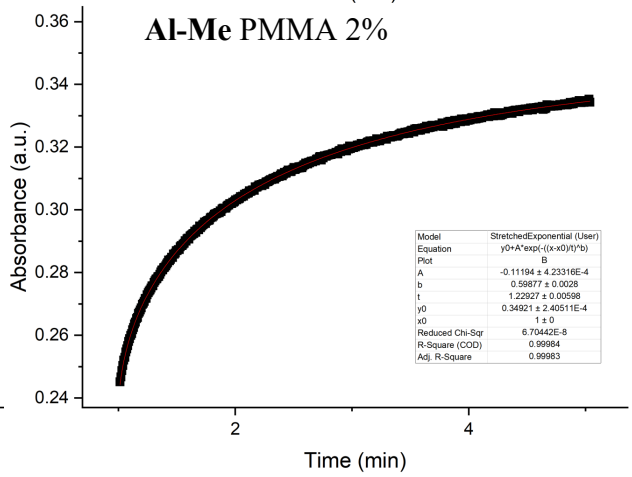



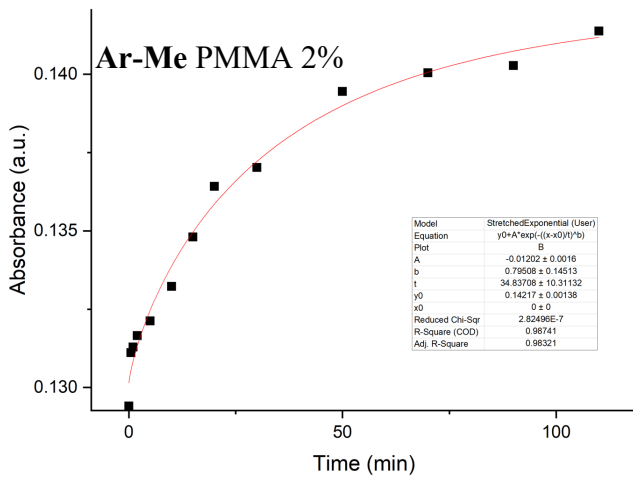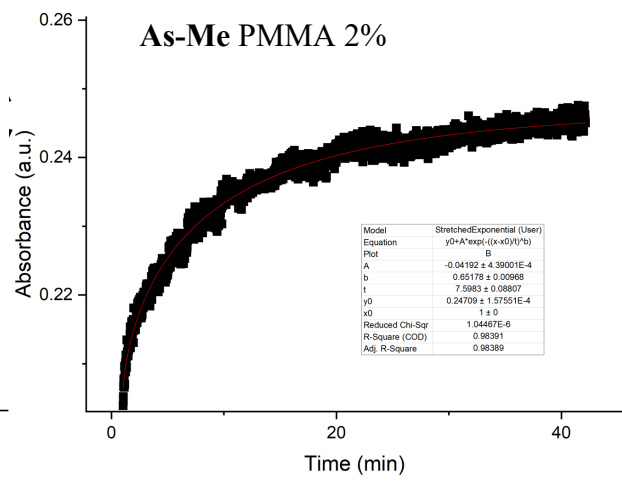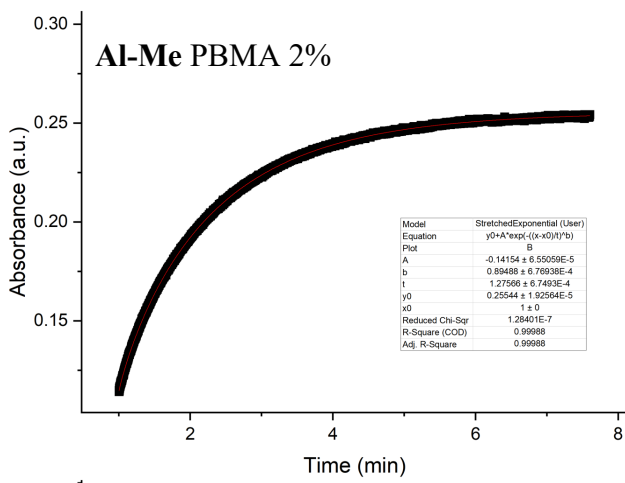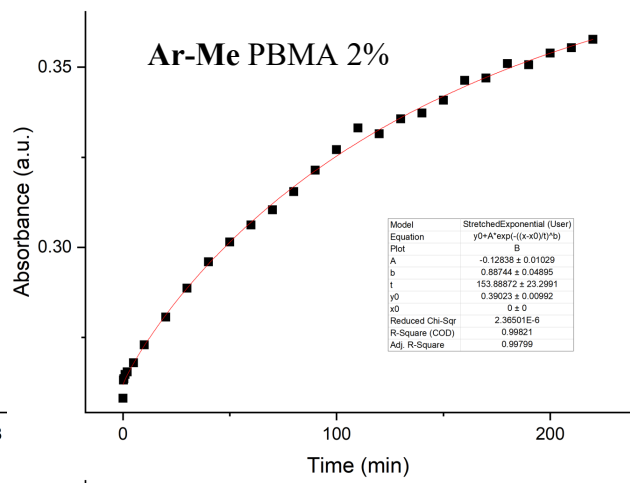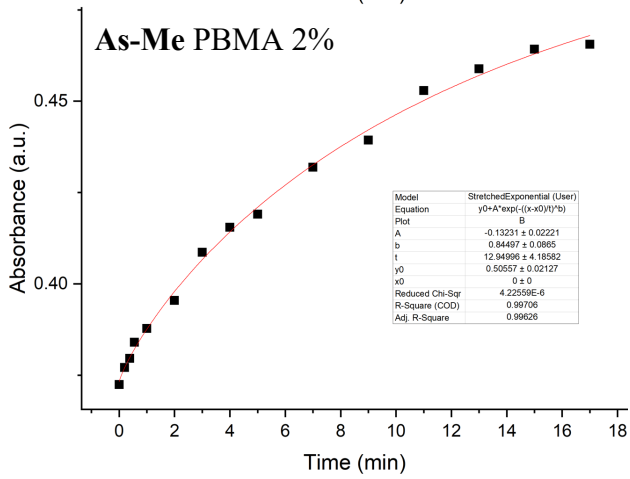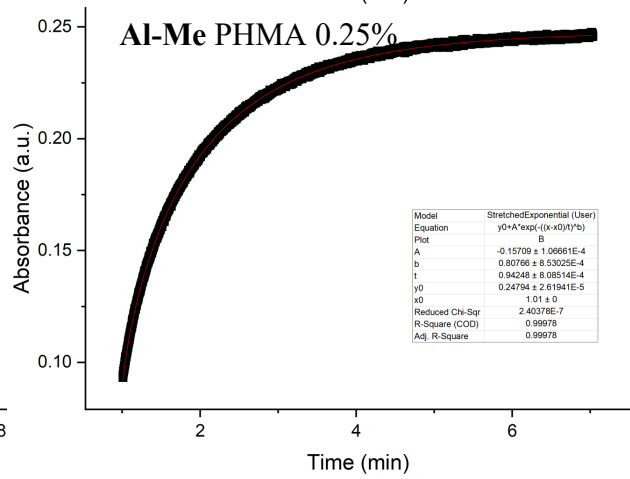

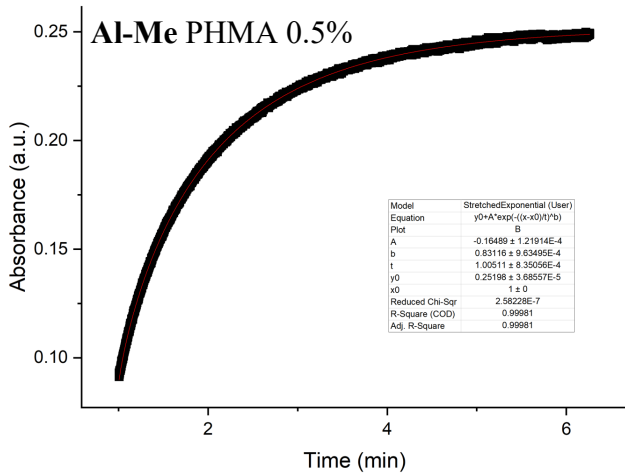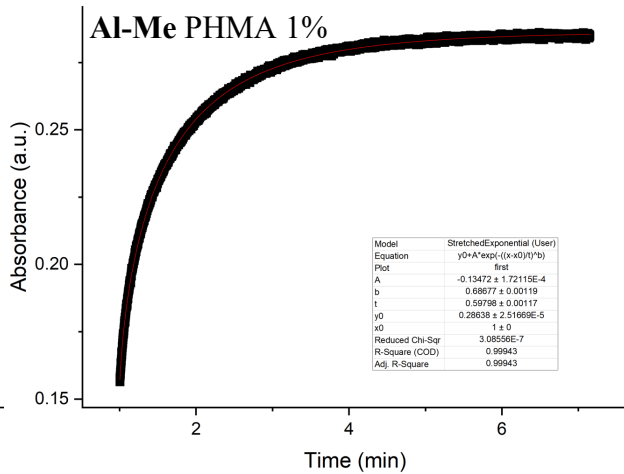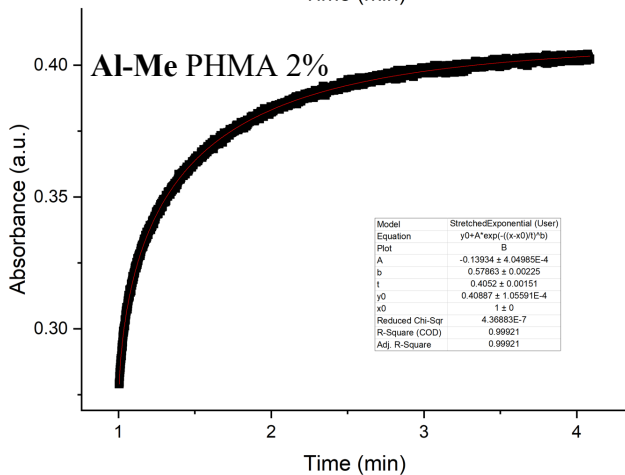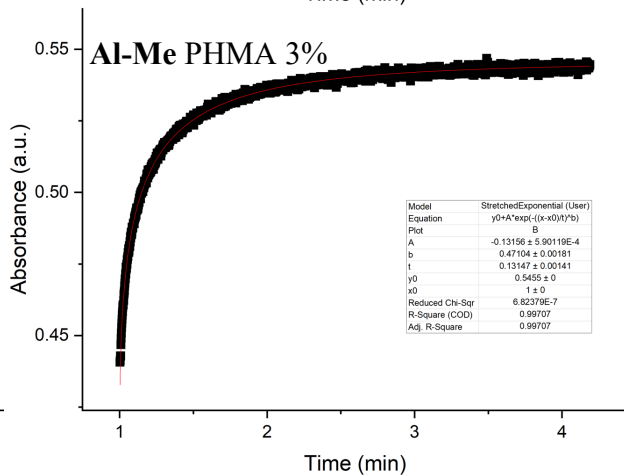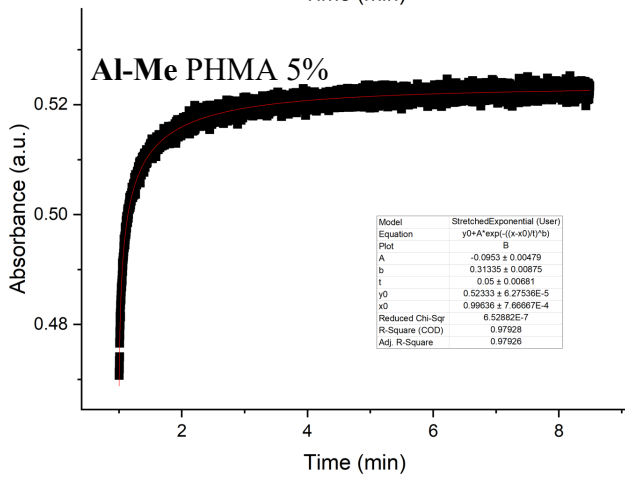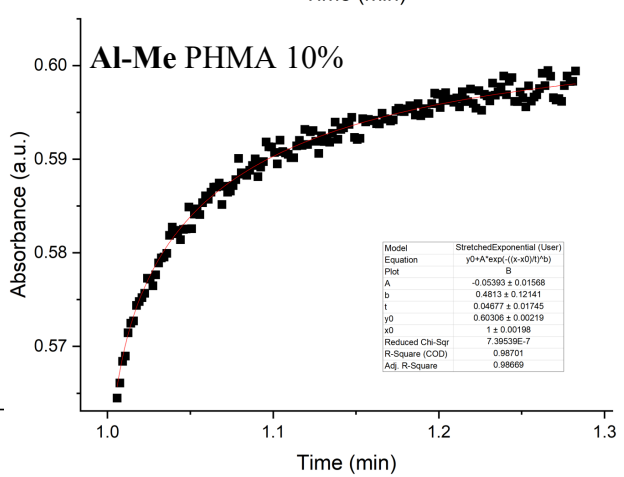

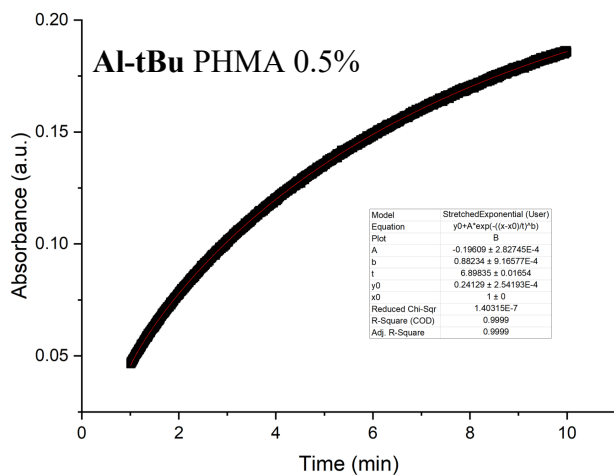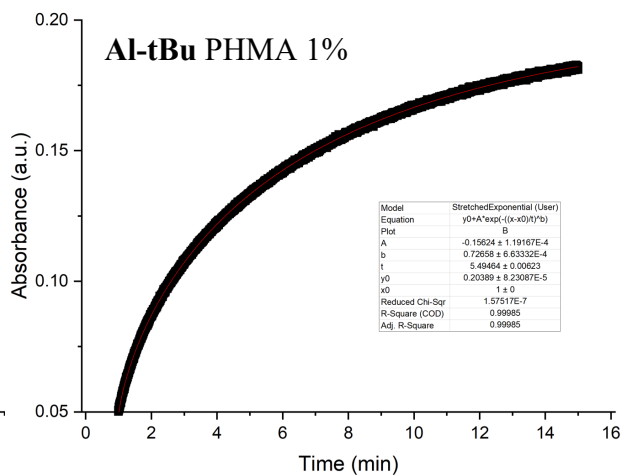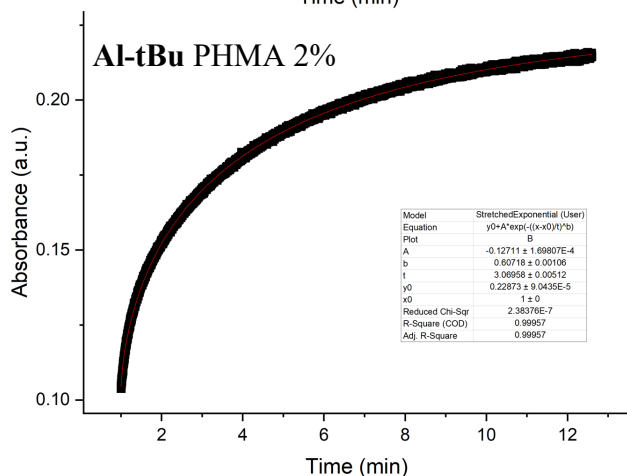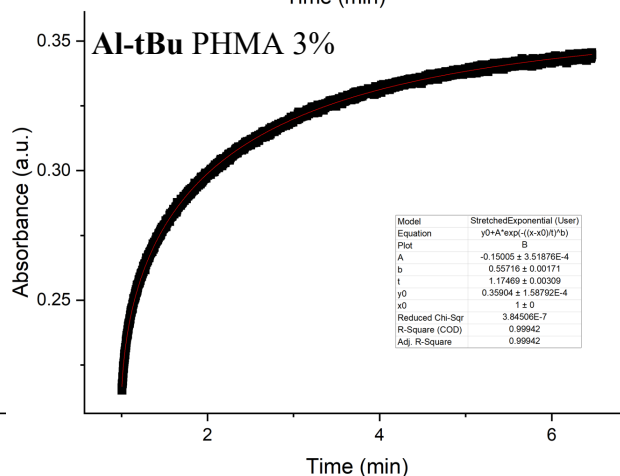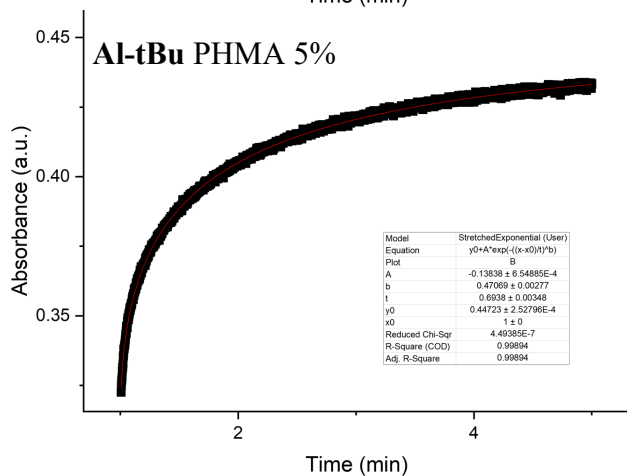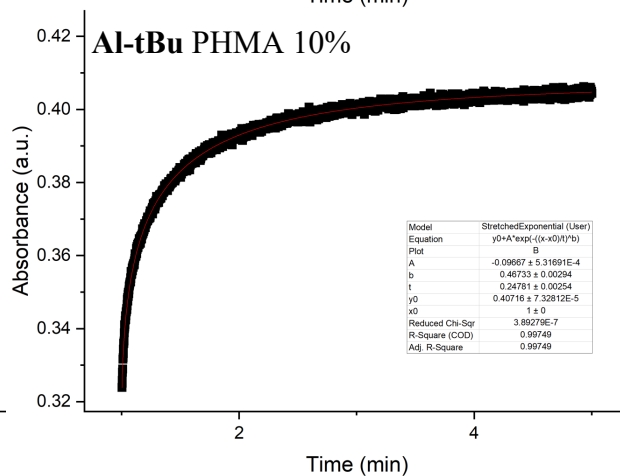

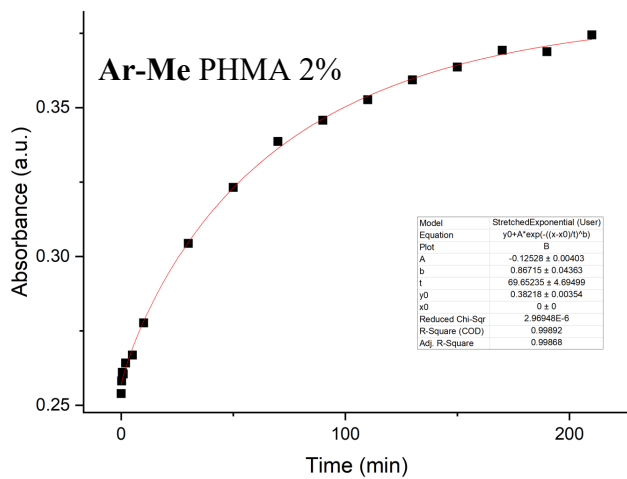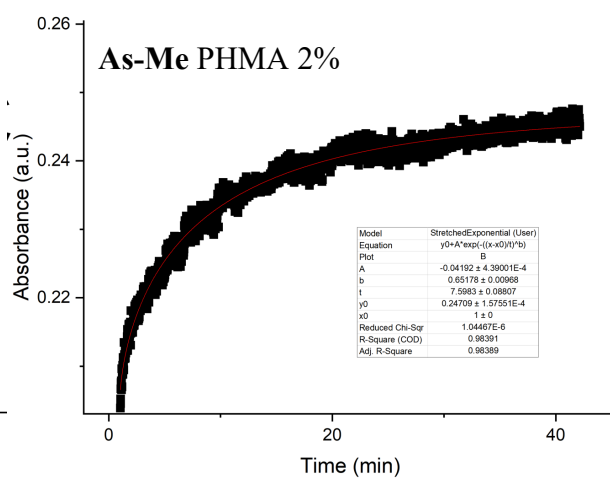

## Sample preparation

Microscope glass slides (25 x 20 mm) were sonicated in isopropanol and acetone and dried. Meanwhile, ca. 100 mg of a given polymer was dissolved in a suitable mixture of higher- and lower-boiling solvents (toluene + dichloromethane or cyclohexanone + dichloromethane, depending on the polymer). Solvent volumes were measured precisely based on the exact mass of the polymer to yield a solution with a desired polymer concentration, and the volume of the indigo stock was taken into account for the concentration calculations. When the polymer had dissolved completely, the indigo stock (in dichloromethane) was added and the mixture filtered through a PTFE filter with 0.2  $\mu\text{m}$  pores. The filtered solution was spin coated (800 rpm for 3 seconds and then 500 rpm for 30 seconds) on the glass slide and then kept at 60 °C (in darkness) for 10 minutes to evaporate off any residual solvent. The exact conditions for the preparation of each polymer film are listed in **Table S4**. Sufficiently thick, smooth and uniform films were acquired in all cases.

**Table S4.** Polymer film preparation conditions.

| Polymer | (mg/ml) | Indigo | (m%) | Solvents                            |
|---------|---------|--------|------|-------------------------------------|
| PHMA    | 400     | Al-Me  | 0.25 | Cyclohexanone : dichloromethane 1:3 |
| PHMA    | 400     | Al-Me  | 0.5  | Cyclohexanone : dichloromethane 1:3 |
| PHMA    | 300     | Al-Me  | 1    | Cyclohexanone : dichloromethane 1:3 |
| PHMA    | 200     | Al-Me  | 2    | Cyclohexanone : dichloromethane 1:3 |
| PHMA    | 200     | Al-Me  | 3    | Cyclohexanone : dichloromethane 1:3 |
| PHMA    | 150     | Al-Me  | 5    | Cyclohexanone : dichloromethane 1:3 |
| PHMA    | 100     | Al-Me  | 10   | Cyclohexanone : dichloromethane 1:3 |
| PHMA    | 400     | Al-tBu | 0.5  | Cyclohexanone : dichloromethane 1:3 |
| PHMA    | 300     | Al-tBu | 1    | Cyclohexanone : dichloromethane 1:3 |
| PHMA    | 200     | Al-tBu | 2    | Cyclohexanone : dichloromethane 1:3 |
| PHMA    | 200     | Al-tBu | 3    | Cyclohexanone : dichloromethane 1:3 |
| PHMA    | 150     | Al-tBu | 5    | Cyclohexanone : dichloromethane 1:3 |
| PHMA    | 100     | Al-tBu | 10   | Cyclohexanone : dichloromethane 1:3 |
| PHMA    | 400     | Ar-Me  | 0.5  | Cyclohexanone : dichloromethane 1:3 |
| PHMA    | 300     | Ar-Me  | 1    | Cyclohexanone : dichloromethane 1:3 |
| PHMA    | 200     | Ar-Me  | 2    | Cyclohexanone : dichloromethane 1:3 |
| PHMA    | 400     | As-Me  | 0.5  | Cyclohexanone : dichloromethane 1:3 |
| PHMA    | 300     | As-Me  | 1    | Cyclohexanone : dichloromethane 1:3 |
| PHMA    | 200     | As-Me  | 2    | Cyclohexanone : dichloromethane 1:3 |
| PBMA    | 400     | Al-Me  | 0.5  | Cyclohexanone : dichloromethane 1:3 |
| PBMA    | 300     | Al-Me  | 1    | Cyclohexanone : dichloromethane 1:3 |
| PBMA    | 200     | Al-Me  | 2    | Cyclohexanone : dichloromethane 1:3 |
| PBMA    | 200     | Al-Me  | 3    | Cyclohexanone : dichloromethane 1:3 |
| PMMA    | 200     | Al-Me  | 2    | Cyclohexanone : dichloromethane 1:3 |
| PMMA    | 200     | Ar-Me  | 2    | Cyclohexanone : dichloromethane 1:3 |
| PMMA    | 200     | As-Me  | 2    | Cyclohexanone : dichloromethane 1:3 |
| PS      | 400     | Al-Me  | 0.5  | Toluene : dichloromethane 1:3       |
| PS      | 300     | Al-Me  | 1    | Toluene : dichloromethane 1:3       |
| PS      | 200     | Al-Me  | 2    | Toluene : dichloromethane 1:3       |
| PS      | 200     | Al-Me  | 3    | Toluene : dichloromethane 1:3       |

## References

- [1] Huang, C.-Y.; Bonasera, A.; Hristov, L.; Garmshausen, Y.; Schmidt, B. M.; Jacquemin, D.; Hecht, S. N,N'-Disubstituted Indigos as Readily Available Red-Light Photoswitches with Tunable Thermal Half-Lives. *J. Am. Chem. Soc.* **2017**, *139* (42), 15205–15211. <https://doi.org/10.1021/jacs.7b08726>.
- [2] Handa Masami, Mizuta Kenji, Hirai Kenji, Okamura Daigo, Gushikawa Toru 2015: Oxime derivative, method of producing the same and insecticide comprising the same as active ingredient. Patent JP2015000848A.
